# Supplementary material
Source: Research Square preprint supplement (doi:10.21203/rs.3.rs-9162471/v1)
Supplement: Supplementary file 1 [file 48c572e685074768b39b770d.xlsx]

## Sheet: Supplementary Table S3 Edson
Transposable elements in a myxozoan–fish system: their role in the lateral transfer of host Siglec genes
Amr G. A. Ibrahim, Fábio S. R. Amaral, Edson A. Adriano
Supplementary Table S3: Gene Ontology (GO) enrichment analysis of genes associated with transposable element (TE) hotspots in Ceratonova shasta
This table summarizes the detailed results of the GO enrichment analysis for genes located within or proximal to TE-rich regions. Each entry includes the GO term identifier, functional description,
GO domain (Biological Process, Molecular Function, or Cellular Component), enrichment score, raw p-value, and false discovery rate (FDR)-corrected p-value. Also listed are the number of
genes contributing to each GO term and the specific gene IDs involved. Significantly enriched biological processes include transcriptional regulation (e.g., GO:0045944 – positive regulation of
transcription), DNA repair (GO:0006281), DNA recombination (GO:0006310), and chromosome organization (GO:0051276), highlighting a strong association between TE activity and genome
structural dynamics. This table provides a comprehensive resource for understanding the functional implications of TE insertions in shaping genome architecture and influencing gene
regulation within the C. shasta genome.
GO_ID,Description,Domain,Enrichment_Score,P_Value,FDR,Gene_Count,Genes,neg_log_pval
GO:0045944,positive regulation of transcription from RNA polymerase II promoter,Biological Process,6.787540778373939,2.2547003506481543e-06,3.382050525972232e-06,38,Gene_3533	Gene_2375	Gene_7563	Gene_0682	Gene_1531	Gene_3499	Gene_4047	Gene_4849	Gene_0877	Gene_0929 ... (+28 more),5.646911167625117
GO:0006281,DNA repair,Biological Process,6.512332984971316,1.1654279823373584e-05,1.7481419735060376e-05,22,Gene_3947	Gene_3306	Gene_9907	Gene_3739	Gene_2965	Gene_9665	Gene_4087	Gene_1595	Gene_0363	Gene_7211 ... (+12 more),4.933514558556826
GO:0006310,DNA recombination,Biological Process,4.44003044578733,1.8426940693711125e-05,2.764041104056669e-05,31,Gene_7653	Gene_4954	Gene_5856	Gene_6251	Gene_1003	Gene_1258	Gene_1937	Gene_6751	Gene_8333	Gene_0894 ... (+21 more),4.7345467619120365
GO:0006351,"transcription, DNA-templated",Biological Process,5.764778742215215,2.788750820897915e-05,4.183126231346873e-05,28,Gene_6057	Gene_2102	Gene_1989	Gene_5031	Gene_7601	Gene_8486	Gene_5043	Gene_9833	Gene_7279	Gene_9167 ... (+18 more),4.554590288868972
GO:0051276,chromosome organization,Biological Process,3.266795462814892,4.2652391621610206e-05,6.397858743241531e-05,71,Gene_0855	Gene_1456	Gene_0353	Gene_0273	Gene_0187	Gene_1668	Gene_6894	Gene_4296	Gene_4044	Gene_8236 ... (+61 more),4.370056611883392
GO:0006357,regulation of transcription by RNA polymerase II,Biological Process,6.510817595873845,5.780556596864918e-05,8.670834895297376e-05,43,Gene_5640	Gene_0726	Gene_3331	Gene_8247	Gene_3426	Gene_3892	Gene_6095	Gene_6531	Gene_6077	Gene_6624 ... (+33 more),4.238030342321853
GO:0000122,negative regulation of transcription from RNA polymerase II promoter,Biological Process,6.684441477870924,8.50795304592419e-05,0.0001276192956888,24,Gene_8741	Gene_7756	Gene_1093	Gene_6636	Gene_2855	Gene_0458	Gene_2400	Gene_4187	Gene_8918	Gene_9308 ... (+14 more),4.070174915566711
GO:0006355,"regulation of transcription, DNA-templated",Biological Process,4.559970653660494,9.507192349792751e-05,0.0001426078852468,75,Gene_6884	Gene_5837	Gene_8602	Gene_2546	Gene_8698	Gene_5574	Gene_0577	Gene_6833	Gene_7112	Gene_0440 ... (+65 more),4.021947719342532
GO:0006974,cellular response to DNA damage stimulus,Biological Process,7.318238610799791,9.742090969386016e-05,0.0001461313645407,79,Gene_8847	Gene_4113	Gene_3020	Gene_6860	Gene_6257	Gene_9479	Gene_4456	Gene_8305	Gene_8918	Gene_1597 ... (+69 more),4.011347819404167
GO:0009615,response to virus,Biological Process,1.7823593922920848,0.0001191400888921,0.0001787101333382,12,Gene_7536	Gene_3039	Gene_0275	Gene_5972	Gene_3911	Gene_5757	Gene_0131	Gene_5031	Gene_9750	Gene_7206 ... (+2 more),3.9239420802038176
GO:0045087,innate immune response,Biological Process,2.3371723742739223,0.0002701565962355,0.0004052348943532,40,Gene_7188	Gene_2680	Gene_7654	Gene_8406	Gene_8175	Gene_6047	Gene_2758	Gene_6799	Gene_0502	Gene_8458 ... (+30 more),3.5683844241132885
GO:0048468,cell development,Biological Process,4.303920485631271,0.0003540077129896,0.0005310115694844,40,Gene_3883	Gene_6491	Gene_8155	Gene_6642	Gene_7465	Gene_4254	Gene_9695	Gene_9368	Gene_3159	Gene_2904 ... (+30 more),3.450987275622995
GO:0002376,immune system process,Biological Process,3.234807873549677,0.0003584099788813,0.0005376149683219,48,Gene_6804	Gene_9948	Gene_8031	Gene_8217	Gene_5478	Gene_6144	Gene_5864	Gene_1643	Gene_2130	Gene_6937 ... (+38 more),3.4456199071774543
GO:0007275,multicellular organism development,Biological Process,2.7377176985224905,0.0003875065497845,0.0005812598246768,47,Gene_7815	Gene_7567	Gene_5237	Gene_3144	Gene_6583	Gene_5188	Gene_0589	Gene_7267	Gene_6517	Gene_2020 ... (+37 more),3.411720952483539
GO:0030154,cell differentiation,Biological Process,3.325956850341486,0.0004196287298469,0.0006294430947704,28,Gene_7173	Gene_8258	Gene_1438	Gene_8636	Gene_8976	Gene_5111	Gene_8711	Gene_4084	Gene_0926	Gene_6694 ... (+18 more),3.3771347855241443
GO:0048513,animal organ development,Biological Process,1.8600339928762863,0.0005621435567577,0.0008432153351365,36,Gene_1370	Gene_1070	Gene_3542	Gene_4028	Gene_9188	Gene_2411	Gene_6752	Gene_1074	Gene_6625	Gene_4444 ... (+26 more),3.250152762818351
GO:0007399,nervous system development,Biological Process,4.135957434712752,0.0007467173428245,0.0011200760142368,41,Gene_1629	Gene_4116	Gene_0877	Gene_5443	Gene_2235	Gene_1717	Gene_1090	Gene_0294	Gene_2693	Gene_6141 ... (+31 more),3.126843761882519
GO:0042981,regulation of apoptotic process,Biological Process,1.6977510132756526,0.001403524066504,0.002105286099756,31,Gene_9453	Gene_0537	Gene_2462	Gene_3296	Gene_7544	Gene_1005	Gene_1045	Gene_2053	Gene_8479	Gene_4874 ... (+21 more),2.852780136032553
GO:0007049,cell cycle,Biological Process,2.7528612276545643,0.0016592311174152,0.0024888466761229,30,Gene_1594	Gene_0680	Gene_4536	Gene_1541	Gene_9625	Gene_0791	Gene_7303	Gene_4929	Gene_7156	Gene_9154 ... (+20 more),2.7800931160689513
GO:0006952,defense response,Biological Process,2.019720724873502,0.0019484723325707,0.0029227084988561,29,Gene_9613	Gene_8712	Gene_8167	Gene_7257	Gene_0392	Gene_2924	Gene_2913	Gene_7009	Gene_8339	Gene_3937 ... (+19 more),2.710305756613494
GO:0016477,cell migration,Biological Process,2.5753474264391465,0.0019578866672468,0.0029368300008703,22,Gene_1533	Gene_8415	Gene_3810	Gene_7245	Gene_3188	Gene_7472	Gene_0372	Gene_1464	Gene_8031	Gene_8898 ... (+12 more),2.70821245104864
GO:0009653,anatomical structure morphogenesis,Biological Process,2.203109868226851,0.0027104858379636,0.0040657287569454,25,Gene_2414	Gene_5415	Gene_4614	Gene_3255	Gene_4852	Gene_4018	Gene_6497	Gene_2340	Gene_9274	Gene_8844 ... (+15 more),2.5669528575257328
GO:0008283,cell proliferation,Biological Process,2.647094044021485,0.0036117591455328,0.0054176387182992,34,Gene_2569	Gene_1814	Gene_9890	Gene_8391	Gene_3496	Gene_1514	Gene_7420	Gene_3401	Gene_1596	Gene_9280 ... (+24 more),2.4422812188385197
GO:0006950,response to stress,Biological Process,3.0802095631387187,0.0048688957358114,0.0073033436037171,14,Gene_2169	Gene_4647	Gene_1453	Gene_4932	Gene_2121	Gene_4145	Gene_0820	Gene_3578	Gene_7926	Gene_3758 ... (+4 more),2.3125695254842147
GO:0006915,apoptotic process,Biological Process,2.9444706157203746,0.0048971274766016,0.0073456912149025,32,Gene_0353	Gene_9956	Gene_3286	Gene_2508	Gene_6337	Gene_5686	Gene_0065	Gene_2165	Gene_8089	Gene_3750 ... (+22 more),2.310058590761428
GO:0000775,"chromosome, centromeric region",Cellular Component,4.465036752909715,1.4183164098421735e-05,2.1274746147632605e-05,19,Gene_6478	Gene_3186	Gene_6262	Gene_6109	Gene_8578	Gene_7839	Gene_7436	Gene_0585	Gene_9689	Gene_4615 ... (+9 more),4.848226872312692
GO:0005694,chromosome,Cellular Component,7.247900307325616,1.529073464955037e-05,2.2936101974325555e-05,78,Gene_3966	Gene_8400	Gene_5846	Gene_6220	Gene_9193	Gene_1762	Gene_1189	Gene_4354	Gene_3061	Gene_3452 ... (+68 more),4.815571648231814
GO:0000793,condensed chromosome,Cellular Component,4.503111742782819,2.4302979279723317e-05,3.645446891958497e-05,45,Gene_1434	Gene_4627	Gene_9341	Gene_5447	Gene_5078	Gene_1760	Gene_9961	Gene_5829	Gene_7712	Gene_5149 ... (+35 more),4.614340483379771
GO:0000785,chromatin,Cellular Component,4.644037044978242,8.497212692097403e-05,0.0001274581903814,23,Gene_5158	Gene_3047	Gene_7626	Gene_2676	Gene_5875	Gene_8969	Gene_5672	Gene_2957	Gene_6408	Gene_9527 ... (+13 more),4.070723510869192
GO:0005667,transcription factor complex,Cellular Component,6.22371779678528,9.365619532808624e-05,0.0001404842929921,71,Gene_2191	Gene_5821	Gene_6905	Gene_6224	Gene_8803	Gene_1911	Gene_3271	Gene_6511	Gene_9993	Gene_1294 ... (+61 more),4.0284634888941
GO:0030529,ribonucleoprotein complex,Cellular Component,2.89205926079649,0.0001363671839229,0.0002045507758844,8,Gene_7348	Gene_1381	Gene_1273	Gene_3929	Gene_0115	Gene_7412	Gene_5653	Gene_2606,3.865290127889816
GO:0005829,cytosol,Cellular Component,1.7167652853731128,0.0002645848929954,0.0003968773394932,13,Gene_9187	Gene_3905	Gene_5418	Gene_7035	Gene_4783	Gene_7383	Gene_3316	Gene_2995	Gene_5176	Gene_3177 ... (+3 more),3.5774349563542467
GO:0016020,membrane,Cellular Component,2.762376889110403,0.0003687614994151,0.0005531422491226,11,Gene_3619	Gene_5034	Gene_1579	Gene_4055	Gene_5064	Gene_7127	Gene_7865	Gene_0713	Gene_9456	Gene_9840 ... (+1 more),3.433254427814719
GO:0005856,cytoskeleton,Cellular Component,1.9870051585139688,0.0003984287681481,0.0005976431522221,30,Gene_4258	Gene_5252	Gene_8022	Gene_9587	Gene_5203	Gene_0106	Gene_2333	Gene_9358	Gene_0813	Gene_6529 ... (+20 more),3.39964931132035
GO:0005840,ribosome,Cellular Component,2.7895780048788144,0.0008539546316857,0.0012809319475285,14,Gene_2701	Gene_6685	Gene_6542	Gene_8986	Gene_8100	Gene_0462	Gene_2065	Gene_4942	Gene_4768	Gene_5307 ... (+4 more),3.068565201596632
GO:0005739,mitochondrion,Cellular Component,3.088679583007249,0.0008728757073296,0.0013093135609945,34,Gene_2866	Gene_0111	Gene_8849	Gene_5489	Gene_7863	Gene_0205	Gene_1743	Gene_1041	Gene_2026	Gene_6304 ... (+24 more),3.059047593022853
GO:0005886,plasma membrane,Cellular Component,2.042010202232656,0.0009020092898861,0.0013530139348291,31,Gene_3358	Gene_6624	Gene_1789	Gene_6013	Gene_3031	Gene_3140	Gene_3231	Gene_6639	Gene_2926	Gene_6296 ... (+21 more),3.0447889895916562
GO:0005794,Golgi apparatus,Cellular Component,2.03496997495303,0.0010301973791634,0.0015452960687452,28,Gene_2284	Gene_0519	Gene_0023	Gene_6397	Gene_5908	Gene_3555	Gene_7771	Gene_7749	Gene_6360	Gene_4426 ... (+18 more),2.9870795593052955
GO:0005634,nucleus,Cellular Component,1.7634602041533554,0.0014712714711442,0.0022069072067164,25,Gene_1132	Gene_4689	Gene_5137	Gene_1709	Gene_4074	Gene_4215	Gene_1497	Gene_2149	Gene_3709	Gene_1363 ... (+15 more),2.8323071861832383
GO:0005737,cytoplasm,Cellular Component,3.124735552188449,0.0019947470904571,0.0029921206356856,16,Gene_9308	Gene_0947	Gene_6047	Gene_2395	Gene_5690	Gene_1298	Gene_8965	Gene_0123	Gene_4177	Gene_4927 ... (+6 more),2.7001121597173916
GO:0005743,mitochondrial inner membrane,Cellular Component,3.2905202732048755,0.0020174070245997,0.0030261105368995,26,Gene_3482	Gene_4695	Gene_3873	Gene_0076	Gene_7847	Gene_6319	Gene_6069	Gene_8950	Gene_1531	Gene_6330 ... (+16 more),2.6952064712942425
GO:0005813,centrosome,Cellular Component,1.814060806357976,0.0024782499144119,0.0037173748716178,8,Gene_2291	Gene_2460	Gene_6874	Gene_9385	Gene_3379	Gene_3817	Gene_8271	Gene_7596,2.6058549001483025
GO:0005819,spindle,Cellular Component,2.953292500040882,0.0030309864884842,0.0045464797327263,34,Gene_6222	Gene_0267	Gene_5325	Gene_8252	Gene_2255	Gene_9279	Gene_5064	Gene_2553	Gene_4262	Gene_6975 ... (+24 more),2.5184159996237447
GO:0005777,peroxisome,Cellular Component,3.3062703933423485,0.0032947329680808,0.0049420994521212,13,Gene_1663	Gene_0158	Gene_8674	Gene_5997	Gene_4139	Gene_1245	Gene_8685	Gene_0712	Gene_0539	Gene_2185 ... (+3 more),2.4821797783957584
GO:0016604,nuclear body,Cellular Component,2.272412631837526,0.0033065191889235,0.0049597787833853,23,Gene_9523	Gene_7518	Gene_8821	Gene_5656	Gene_8812	Gene_4908	Gene_6337	Gene_2703	Gene_0641	Gene_3165 ... (+13 more),2.4806289525851595
GO:0005783,endoplasmic reticulum,Cellular Component,2.751201152024217,0.0033737954857077,0.0050606932285616,25,Gene_2470	Gene_1879	Gene_1206	Gene_2972	Gene_5860	Gene_6834	Gene_0389	Gene_8148	Gene_4691	Gene_1243 ... (+15 more),2.4718812472123974
GO:0005622,intracellular,Cellular Component,1.77489628533583,0.0034281049895283,0.0051421574842925,16,Gene_7298	Gene_0608	Gene_5509	Gene_9443	Gene_4543	Gene_2576	Gene_5765	Gene_3131	Gene_5752	Gene_0816 ... (+6 more),2.464945885793597
GO:0000307,cyclin-dependent protein kinase holoenzyme complex,Cellular Component,2.5310931171540143,0.00438092712056,0.00657139068084,12,Gene_1301	Gene_0158	Gene_1901	Gene_1152	Gene_7708	Gene_8162	Gene_3422	Gene_8971	Gene_0011	Gene_8809 ... (+2 more),2.3584339715198164
GO:0005730,nucleolus,Cellular Component,2.7017746066219264,0.0044542555199682,0.0066813832799524,12,Gene_8547	Gene_4175	Gene_5322	Gene_8452	Gene_4341	Gene_1584	Gene_5698	Gene_6936	Gene_6270	Gene_5789 ... (+2 more),2.3512248731283836
GO:0005654,nucleoplasm,Cellular Component,2.045434101051872,0.0049707452527414,0.0074561178791122,27,Gene_3079	Gene_1331	Gene_8182	Gene_6894	Gene_8160	Gene_5190	Gene_8988	Gene_8708	Gene_0879	Gene_3546 ... (+17 more),2.3035784935827133
GO:0003690,double-stranded DNA binding,Molecular Function,2.7711306421790307,8.356169345157798e-07,1.2534254017736696e-06,41,Gene_3507	Gene_6689	Gene_6894	Gene_4967	Gene_3333	Gene_0468	Gene_3651	Gene_1698	Gene_1498	Gene_0136 ... (+31 more),6.077992767240995
GO:0008134,transcription factor binding,Molecular Function,6.997788622945865,1.419972488060966e-05,2.129958732091449e-05,26,Gene_4350	Gene_7284	Gene_7563	Gene_9515	Gene_0634	Gene_4643	Gene_0395	Gene_8243	Gene_7996	Gene_7733 ... (+16 more),4.8477200699824765
GO:0000981,"DNA-binding transcription factor activity, RNA polymerase II-specific",Molecular Function,2.629001241051459,1.7462576280820342e-05,2.6193864421230516e-05,60,Gene_9280	Gene_2216	Gene_3468	Gene_4850	Gene_2803	Gene_0669	Gene_9339	Gene_3475	Gene_8492	Gene_4287 ... (+50 more),4.7578916837687
GO:0003682,chromatin binding,Molecular Function,7.06260870286862,2.11799090832438e-05,3.17698636248657e-05,33,Gene_1022	Gene_1900	Gene_1320	Gene_9378	Gene_5006	Gene_6093	Gene_9613	Gene_1038	Gene_6753	Gene_3113 ... (+23 more),4.674075908474534
GO:0043565,sequence-specific DNA binding,Molecular Function,2.746596788800771,2.9434169654813923e-05,4.415125448222088e-05,47,Gene_9788	Gene_3362	Gene_0397	Gene_5398	Gene_4855	Gene_8651	Gene_8507	Gene_0604	Gene_1461	Gene_2289 ... (+37 more),4.531148211233462
GO:0003700,DNA-binding transcription factor activity,Molecular Function,6.001692980181986,4.77469815611588e-05,7.16204723417382e-05,49,Gene_9561	Gene_8200	Gene_3002	Gene_9176	Gene_4974	Gene_8606	Gene_5950	Gene_2530	Gene_8332	Gene_4639 ... (+39 more),4.321054078169604
GO:0003887,DNA-directed DNA polymerase activity,Molecular Function,4.103332529314118,8.275170687261581e-05,0.0001241275603089,65,Gene_8038	Gene_1821	Gene_7658	Gene_1021	Gene_4284	Gene_5718	Gene_7521	Gene_8450	Gene_7743	Gene_3866 ... (+55 more),4.082223039513413
GO:0003677,DNA binding,Molecular Function,4.346093611914909,8.84493370444792e-05,0.0001326740055667,76,Gene_5575	Gene_0648	Gene_1745	Gene_8936	Gene_0665	Gene_7911	Gene_8852	Gene_5085	Gene_6038	Gene_7843 ... (+66 more),4.053305417915405
GO:0046872,metal ion binding,Molecular Function,2.4284051643789857,0.0005701307249196,0.0008551960873795,16,Gene_7595	Gene_1804	Gene_4998	Gene_8024	Gene_8330	Gene_9554	Gene_3777	Gene_6086	Gene_7944	Gene_7623 ... (+6 more),3.2440255537976905
GO:0016740,transferase activity,Molecular Function,3.080882013041615,0.0008059366137358,0.0012089049206037,29,Gene_0376	Gene_9001	Gene_2022	Gene_2075	Gene_8729	Gene_6655	Gene_3037	Gene_6088	Gene_5210	Gene_9818 ... (+19 more),3.0936991137622565
GO:0004518,nuclease activity,Molecular Function,2.071988213323568,0.0009060548598079,0.0013590822897119,28,Gene_8425	Gene_2364	Gene_7997	Gene_7855	Gene_1748	Gene_2757	Gene_1598	Gene_2373	Gene_8757	Gene_8353 ... (+18 more),3.042845505865629
GO:0005515,protein binding,Molecular Function,2.7350432457527534,0.0009541482384936,0.0014312223577405,33,Gene_7199	Gene_8491	Gene_8882	Gene_1831	Gene_4343	Gene_7104	Gene_9455	Gene_9768	Gene_0093	Gene_7347 ... (+23 more),3.0203841471423662
GO:0000166,nucleotide binding,Molecular Function,2.9207720198915754,0.001103416321904,0.0016551244828561,19,Gene_7578	Gene_7584	Gene_6189	Gene_9505	Gene_1243	Gene_7798	Gene_0068	Gene_7403	Gene_2113	Gene_1974 ... (+9 more),2.95726059617997
GO:0005524,ATP binding,Molecular Function,2.33044483518464,0.0020238317151516,0.0030357475727275,18,Gene_1608	Gene_4676	Gene_8589	Gene_0818	Gene_1566	Gene_8825	Gene_5185	Gene_7315	Gene_4567	Gene_6682 ... (+8 more),2.693825602612643
GO:0016491,oxidoreductase activity,Molecular Function,1.7086919449464448,0.0020660547577807,0.003099082136671,31,Gene_3718	Gene_0058	Gene_4263	Gene_8269	Gene_0844	Gene_0960	Gene_9152	Gene_1898	Gene_7106	Gene_8523 ... (+21 more),2.684858172319372
GO:0003676,nucleic acid binding,Molecular Function,2.138325542663738,0.0021329822124218,0.0031994733186328,21,Gene_2252	Gene_8173	Gene_0289	Gene_7248	Gene_7943	Gene_6196	Gene_2329	Gene_3842	Gene_5515	Gene_5999 ... (+11 more),2.671012766247369
GO:0042802,identical protein binding,Molecular Function,1.5719952022912391,0.0023460879391715,0.0035191319087572,32,Gene_1691	Gene_7094	Gene_8800	Gene_5192	Gene_7660	Gene_9423	Gene_1632	Gene_8658	Gene_9357	Gene_6155 ... (+22 more),2.6296557131151426
GO:0004386,helicase activity,Molecular Function,1.536905113455301,0.002354357069317,0.0035315356039755,33,Gene_3024	Gene_3750	Gene_7572	Gene_4897	Gene_7796	Gene_1032	Gene_7386	Gene_0745	Gene_7976	Gene_8043 ... (+23 more),2.6281276700083085
GO:0016787,hydrolase activity,Molecular Function,2.448285377696906,0.003390246733402,0.0050853701001031,24,Gene_2976	Gene_2040	Gene_4731	Gene_0002	Gene_8878	Gene_0370	Gene_5268	Gene_2761	Gene_8886	Gene_2010 ... (+14 more),2.4697686938158956
GO:0004674,protein serine/threonine kinase activity,Molecular Function,3.454450630719106,0.0034298144959043,0.0051447217438565,29,Gene_5148	Gene_3463	Gene_9900	Gene_2482	Gene_9711	Gene_6223	Gene_5783	Gene_2425	Gene_1955	Gene_3814 ... (+19 more),2.464729368465614
GO:0008270,zinc ion binding,Molecular Function,1.998595740920376,0.0037617000027049,0.0056425500040574,15,Gene_7829	Gene_6795	Gene_8983	Gene_1383	Gene_6395	Gene_9626	Gene_4223	Gene_5785	Gene_8435	Gene_7659 ... (+5 more),2.4246158425881226
GO:0003723,RNA binding,Molecular Function,2.874403714748614,0.003860296149912,0.005790444224868,9,Gene_1087	Gene_4641	Gene_7084	Gene_0124	Gene_7194	Gene_0622	Gene_5625	Gene_7072	Gene_9454,2.4133793763285167
GO:0004672,protein kinase activity,Molecular Function,3.3531092823856423,0.0043473974113447,0.0065210961170171,16,Gene_9964	Gene_1676	Gene_5811	Gene_3476	Gene_0235	Gene_6268	Gene_8923	Gene_9358	Gene_5416	Gene_3602 ... (+6 more),2.3617706575627615
GO:0019904,protein domain specific binding,Molecular Function,2.728969521204188,0.0045895106030428,0.0068842659045643,34,Gene_0121	Gene_6371	Gene_3178	Gene_7068	Gene_4175	Gene_6480	Gene_6517	Gene_9408	Gene_2816	Gene_2109 ... (+24 more),2.3382336224648457
GO:0008233,peptidase activity,Molecular Function,1.930671313204718,0.0048238032313487,0.007235704847023,26,Gene_3633	Gene_0999	Gene_6967	Gene_5013	Gene_9145	Gene_8723	Gene_6674	Gene_1254	Gene_0599	Gene_3177 ... (+16 more),2.3166104158932708
