# Supplementary material
Source: Research Square preprint supplement (doi:10.21203/rs.3.rs-9162471/v1)
Supplement: Supplementary file 2 [file 94a54500f35ec2ea3c57239c.xlsx]

## Sheet: Supplementary Table S4 - Differ
Transposable elements in a myxozoan–fish system: their role in the lateral transfer of host Siglec genes
Amr G. A. Ibrahim, Fábio S. R. Amaral, Edson A. Adriano
Supplementary Table S4: Differentially Expressed Genes (DEGs) in Host and Parasite During Infection
This table contains the complete results of the differential gene expression analysis derived from the RNA-seq data. It is divided into two parts: (1) DEGs in the host (O. mykiss) when comparing
infected versus uninfected tissue, and (2) DEGs in the parasite (C. shasta). For each gene, the table lists the Gene ID, a brief functional annotation, the log2-fold change in expression, the p-value,
and the false discovery rate (FDR)-adjusted p-value. This table provides the raw data behind the transcriptional analysis and the scatterplots in Figure 8, allowing for independent verification of the
findings. It is also a rich resource for researchers interested in the specific genes and pathways that are modulated during the C. shasta-O. mykiss interaction, enabling more detailed investigations
into the molecular basis of host defense and parasite virulence.
host_uninfected,host_infected,parasite,gene_id
6.668342460740176,4.430350308862046,23.195093520772346,Gene_001
4.012395959659116,3.080379007437351,13.232182078601921,Gene_002
7.524398173405662,5.81430039585373,5.203901599017293,Gene_003
15.156415158384302,10.358411557472465,8.782415955487412,Gene_004
3.7161095465810194,0.5764624864001022,0.601980563968015,Gene_005
3.7161583550993678,1.1043049651614731,0.4884636014679015,Gene_006
15.85318223991954,21.541427993455088,31.258541482424224,Gene_007
8.280867913064641,5.585063888933435,29.651218369643214,Gene_008
3.07843235342378,9.277447297278126,7.929588120528364,Gene_009
6.917455743289707,20.01613119389941,17.304018164373975,Gene_010
3.093384644796861,0.1,0.2774036926946853,Gene_011
3.0876682584827924,3.215279723306394,18.400044313102956,Gene_012
5.438861833815426,14.638773464172292,12.126767662368323,Gene_013
0.9698399746072333,1.3635734863312976,1.3476248062360012,Gene_014
1.127570968881648,10.63283040752379,9.790715644985234,Gene_015
2.8581368931888704,2.625645200505243,2.769966438891448,Gene_016
1.9931874753831575,0.2685222277848084,0.8655185442728459,Gene_017
5.762652464821198,0.1,0.1,Gene_018
2.1675136767740963,0.7180719486695335,0.2145192282656711,Gene_019
1.4479619832130828,0.1,0.1,Gene_020
14.47638954623309,11.463424007748063,32.579346988424824,Gene_021
3.741097283144538,0.1,24.73214493123345,Gene_022
4.730460541114998,3.661788553118415,25.034741888351807,Gene_023
1.4336181893321467,0.1,0.6968201277842455,Gene_024
2.899371010045186,1.1733043670797914,0.934105552586227,Gene_025
4.897564651987941,4.2452795075536045,14.42212732205179,Gene_026
1.7846193408469375,1.1479076274227178,0.5708797332052431,Gene_027
6.053026619742109,2.3385222383300976,1.3258012338342753,Gene_028
2.7717781566733346,0.8047024428920388,1.013265310042999,Gene_029
3.548925920725267,2.944872851156771,14.065373405764403,Gene_030
2.7694111329494673,8.209304045859918,28.054265779336575,Gene_031
19.723731346063353,12.093989115136381,9.761859239040477,Gene_032
4.433557105495827,13.28244940132137,11.155768111407113,Gene_033
1.9228938345403812,0.37181588359724826,0.9836521111734182,Gene_034
8.654123648195627,20.651179208353074,17.44966578655467,Gene_035
1.6876298349308883,1.7732807277401466,0.9060314373318821,Gene_036
5.296736499033361,9.09692694200175,7.634090675067109,Gene_037
0.9345070582889877,0.7844494126967058,0.5576925728931317,Gene_038
1.548754656974414,0.13510903646258277,0.1,Gene_039
5.246121222037285,0.1,0.1,Gene_040
8.091169355873935,0.1,0.1,Gene_041
5.140213548228352,2.946444399176732,2.78296028522559,Gene_042
4.085652205060355,3.0573760578127613,3.3383520871189853,Gene_043
3.5223100674748964,0.1,22.81741066217551,Gene_044
1.3732530410180674,0.1,0.1,Gene_045
2.519661666751684,1.110395517041872,0.5012258259889231,Gene_046
3.100269314095038,1.2902272150638752,2.126037054104238,Gene_047
10.440555407328773,5.48033816530881,4.681974814118283,Gene_048
5.899659466212036,5.658340768064538,4.815161369620036,Gene_049
1.0937015665631589,1.142198993091042,0.9612191092833843,Gene_050
5.8081794583177615,1.9718469297886028,1.7553037946274543,Gene_051
3.293445152379517,3.0775014278934414,2.558132048939848,Gene_052
2.6076838140099388,4.111197724821123,3.2650532633458598,Gene_053
7.310714640873578,5.625387097185523,4.562835456111538,Gene_054
10.224631048450883,4.311534669925713,3.651703161350457,Gene_055
9.440643028779334,5.083304929828099,4.103439281900378,Gene_056
2.29016984152762,2.8943952839405194,2.175097678278576,Gene_057
3.499534988776324,0.1,0.12757209107675874,Gene_058
5.841635126835854,4.037564389876986,3.329938844427096,Gene_059
9.780944966277834,20.5657842114994,18.082513775207563,Gene_060
3.054636528864993,0.7204653514252961,0.1,Gene_061
3.8631110048411434,0.1,0.5216027407689847,Gene_062
1.8495308656471883,0.1,0.5834340769990516,Gene_063
1.7212223391748989,0.1,21.578338118148356,Gene_064
8.58503574428783,0.1,0.1,Gene_065
13.263183287231795,6.460570153981257,5.342908284485752,Gene_066
4.230803394219776,4.497375601249828,3.2597645831752247,Gene_067
10.002412544167408,0.21110191192416838,0.1,Gene_068
5.985314107195864,3.063135080281138,23.9915392081138,Gene_069
2.674879135444809,1.7618161740101947,2.1984519252781145,Gene_070
5.9841630287283225,2.5135377024824868,15.2032382557266,Gene_071
15.33947012311618,7.48064749245438,6.867172406583887,Gene_072
4.355063402326496,4.008834543981849,3.696178188001866,Gene_073
15.669480834599398,9.413968173983143,7.550252239398779,Gene_074
0.5511236508654194,0.1,13.325997138959599,Gene_075
8.649677210135666,0.1,0.28074982449116725,Gene_076
4.804906842371657,0.1,0.1,Gene_077
3.5282222056685293,1.3966730708105637,1.4723714822579343,Gene_078
4.82306019209838,2.9775986172470508,2.434828665396739,Gene_079
0.9138808000978493,0.1,0.1,Gene_080
3.759411727577992,2.3918678508482927,2.3174716605024455,Gene_081
5.963693817930097,4.3727731001833146,3.894562459750233,Gene_082
14.618900346472186,10.674560387257733,26.83435130601937,Gene_083
2.960575944878785,0.290966968335052,0.7110538444304935,Gene_084
2.34715772561606,3.9679346849571564,21.856257039601807,Gene_085
2.99994622987466,4.975697746722063,28.924267129093437,Gene_086
9.32148260803871,0.1,0.32224050318735353,Gene_087
5.82990606409675,0.1,0.1,Gene_088
2.9334870562607587,8.967719960613728,7.753015175418516,Gene_089
6.7572361066828,3.3071022402249675,2.310591473637101,Gene_090
4.843618374620675,2.656424324343675,2.627571483374884,Gene_091
9.727101828011927,5.244659975216556,4.384000124356877,Gene_092
2.5557801637608835,0.8262303899234762,0.493206623227339,Gene_093
3.4482618163050476,3.0884796062082582,16.832442600937508,Gene_094
3.274985617564698,2.3934099536968754,1.7526609844252405,Gene_095
1.3898391784530297,0.1,0.1,Gene_096
5.679687545651957,0.1,0.1,Gene_097
5.522574893514815,3.68230436116082,3.372362687524953,Gene_098
4.500060158821743,3.675470637899798,2.611978301216315,Gene_099
3.714820254557059,0.1,23.175729159792194,Gene_100
1.444413571557332,10.299098563303875,7.921462015654805,Gene_101
3.2010655597121134,1.2484220875909045,1.739741321768284,Gene_102
3.4069872172998448,2.940944656527821,2.5842099449296954,Gene_103
2.358859370513028,2.1477599408279744,1.7869107049556212,Gene_104
3.9391754732746587,0.1,0.1,Gene_105
6.191891945367581,3.8559280271910867,3.4371932688532523,Gene_106
20.266083413858283,13.692847923261079,11.623866853801978,Gene_107
5.153428649105051,0.1,0.5263207528066086,Gene_108
5.507111805889308,3.96078394093763,20.51596573578813,Gene_109
4.222567128517998,2.290909094190126,2.007393434646358,Gene_110
0.9655890279105107,0.318135972873642,0.1249706920570533,Gene_111
4.387628603233144,3.9511093843245146,3.3356647271874103,Gene_112
4.702922706782707,3.81225324285526,3.3635359639837943,Gene_113
25.0,15.976211563200767,12.895712471658001,Gene_114
3.8424540122533926,3.8720469759372307,18.634233932382312,Gene_115
5.704400382117319,17.102916098169505,37.621004209032876,Gene_116
4.358947304278378,0.4517762909267562,0.4523560225389195,Gene_117
1.7595490768781374,0.6834093382147353,0.5073046029414533,Gene_118
11.18147344092076,7.0978836875385865,6.040574707633956,Gene_119
8.178808060723831,12.330141441642475,10.619652907540772,Gene_120
8.438677125467912,5.179601433272008,4.186757346157462,Gene_121
2.16515085100181,0.1,0.1,Gene_122
13.766463437061796,7.278013242356911,6.264649358042447,Gene_123
1.4601207675015735,3.3869371913234967,2.4875475015789594,Gene_124
7.166989378717658,3.0929727694309523,2.792327956302098,Gene_125
25.0,13.54297366465472,10.830494173261375,Gene_126
2.0290565673845635,0.1,0.4966622549302575,Gene_127
2.848982224580382,2.6593845675037526,13.569932141711217,Gene_128
4.8536019143774904,3.6611049290890803,3.2143510834512687,Gene_129
2.995824472654026,15.969797062292272,35.272886407284425,Gene_130
1.2962419303315649,8.562839967385482,7.94460375006269,Gene_131
4.73437811377638,1.7639216224828302,1.9050814051176579,Gene_132
1.9158416481294,1.2404704587101116,0.31805019737093676,Gene_133
6.546129405416325,3.115083589435261,2.135990264325691,Gene_134
2.147835546751379,0.1,0.1,Gene_135
15.486172422850435,9.115234595907694,7.758385826605873,Gene_136
2.395033854206444,0.4464236763728524,12.97059798225592,Gene_137
3.4637464317865527,0.1,20.423282543778054,Gene_138
8.591847374177934,12.149800443125248,33.42285192043168,Gene_139
1.6741549773644018,0.1,0.1,Gene_140
5.376125501295033,2.2390108260973016,1.658552080985927,Gene_141
12.752332594070555,7.943824210232627,6.189586139958443,Gene_142
1.238639267746686,0.1,0.1,Gene_143
5.195054351801142,2.5087008006353293,1.5917218382934966,Gene_144
5.51739724441614,2.7451923799076963,26.107618746098055,Gene_145
8.37673564490097,0.1,0.5064567186431358,Gene_146
1.6660231368237604,0.1,0.1,Gene_147
1.5583611271730837,0.1,1.1379528259349563,Gene_148
6.804289706606693,3.220440758461092,2.934701805044284,Gene_149
5.683616504088728,3.1540333203990203,2.7548627718171166,Gene_150
5.476106086756929,3.658752730771763,2.766596709083513,Gene_151
5.913031047818815,1.4479136822574619,1.5108505816824391,Gene_152
2.601219107768353,17.24019211916856,14.423908170798168,Gene_153
5.396782581335611,3.046143312845254,2.6380257417766106,Gene_154
5.665855956419694,0.1,22.67379820328955,Gene_155
2.5307580075136493,0.3154195669428188,0.22968267201153605,Gene_156
19.937843493600575,22.89687773904792,19.922055408705,Gene_157
6.547388950952947,3.582043003867602,2.7634659832371065,Gene_158
1.7279870950953855,1.4240545294629385,1.196450953844713,Gene_159
7.577951306282587,3.5540936515067645,3.729299858034954,Gene_160
2.054956467073842,1.8561896973337118,1.326974419618548,Gene_161
8.412070872689869,6.886529219217014,6.578529259533233,Gene_162
11.32345754760174,6.663562350412814,18.44279257601717,Gene_163
2.324381879280251,0.1,15.61419719572662,Gene_164
9.68618751710318,6.639885300315243,22.586240206044987,Gene_165
6.235287829314633,3.2597081313257763,22.873378342506214,Gene_166
8.650768215109059,5.459371907237935,4.889190106039123,Gene_167
20.438786324933545,5.944867265539884,4.425047287752719,Gene_168
3.6828595689105326,12.35413096052971,24.685772910970194,Gene_169
2.4522625017291984,0.1,0.1,Gene_170
2.1998484162801115,1.349321258878798,1.1171496984069595,Gene_171
2.3334591305519767,0.1,0.3332688390202712,Gene_172
4.213605238694919,4.269535472571001,3.7001855520586524,Gene_173
5.888030608416202,4.6839433563519695,3.4472141094151336,Gene_174
5.592087428989228,5.939071406407404,5.200289835848679,Gene_175
8.68629589463903,4.290960461317759,16.497852819847125,Gene_176
4.528548702782538,3.7639139857343364,20.451334318575366,Gene_177
14.336765641596196,4.351024306960129,4.130682951137958,Gene_178
3.6265237086414865,4.803677745046098,4.416694945108746,Gene_179
25.0,6.649449509815266,5.835704115034351,Gene_180
7.393002008212926,3.428134994310824,2.8858484605807413,Gene_181
2.2575360041567247,0.6352504279612081,0.1,Gene_182
1.9027229685567417,0.1,0.2568472876530344,Gene_183
6.592798600530086,3.324773134301138,2.909132239021212,Gene_184
3.748027762899887,1.3378574638754945,1.2458103791723198,Gene_185
7.9343417499823765,4.941077593760875,3.6892165243686197,Gene_186
6.544271583980681,4.336670121321,24.816558615074392,Gene_187
4.228032986420285,4.7882247989112345,4.491252220407711,Gene_188
2.276331203219979,2.5063073277552474,2.114539167049298,Gene_189
1.3339203262383776,0.10806780894814283,0.3644579165549712,Gene_190
3.13549807902223,0.8032012417953085,0.6940484059781967,Gene_191
8.891706918791012,5.925327157082414,5.04843053931835,Gene_192
5.318945105777711,1.607087215041856,1.7413376551759767,Gene_193
1.6543513145342623,3.190361307745782,2.5053892202969648,Gene_194
5.147672859870326,4.50393186078774,3.8667903924459726,Gene_195
6.099787312591153,3.0968616050290456,13.316229157174647,Gene_196
2.2098266002787943,0.1,0.1,Gene_197
5.068171414302677,4.6655496975801025,3.8420483935556313,Gene_198
4.695323318675486,0.1,0.17385350865348514,Gene_199
1.7961109816013108,2.5630461633289405,1.9870897901642084,Gene_200
