# Supplementary material
Source: Research Square preprint supplement (doi:10.21203/rs.3.rs-9162471/v1)
Supplement: Supplementary file 3 [file 9bd1c48ef2e52dddd9828129.xlsx]

## Sheet: Supplementary Table S2 - Compre
Transposable elements in a myxozoan–fish system: their role in the lateral transfer of host Siglec genes
Amr G. A. Ibrahim, Fábio S. R. Amaral, Edson A. Adriano
Supplementary Table S2: Comprehensive List of Identified Transposable Elements in the Ceratonova shasta Genome.
This table provides the complete, unabridged dataset of all transposable elements identified and classified in the C. shasta genome by the TEDAT pipeline. The table includes the following columns for each identified element: Scaffold ID,
Start Coordinate, End Coordinate, TE Name/ID, TE Class, and TE Family. This foundational dataset underpins the entire TE analysis presented in the paper, including the calculations of TE density,
family abundance, and genomic distribution. Providing this complete table ensures full reproducibility of the study's findings and serves as a valuable resource for other researchers wishing to conduct further analyses on the repetitive
element landscape of C. shasta.
seqnames	start	end	width	strand	source	type	score	phase	TE_ID	Div	Del	Ins	SWscore	color	pvalue	log2FoldChange	TE_Expression_host
CAKKLC010000370.1	4099	4342	244	-	RepeatMasker-4.0.1	transposable_element	15	NA	Tigger10 DNA/TcMar-Tigger 576 829	41.8	6.2	2	15	#ff6666	0.000261703	1.63227	24
CAKKLC010000380.1	20321	20439	119	-	RepeatMasker-4.0.1	transposable_element	18	NA	Charlie19a DNA/hAT-Charlie 246 358	36.4	0	5.3	18	#ff6666	0.000261694	0	18.2
CAKKLC010000383.1	1	410	410	-	RepeatMasker-4.0.1	transposable_element	154	NA	Cheshire DNA/hAT-Charlie 1149 1558	33.3	1	1	154	#ff6666	0.000261759	0	17.15
CAKKLC010000394.1	31207	31289	83	-	RepeatMasker-4.0.1	transposable_element	7	NA	Tigger7 DNA/TcMar-Tigger 1292 1374	34.9	0	0	7	#ff6666	0.000261784	0	17.45
CAKKLC010000394.1	31818	31920	103	+	RepeatMasker-4.0.1	transposable_element	24	NA	MER58B DNA/hAT-Charlie 11 105	25.7	1	9.5	24	#ff6666	0.000261842	-3.24793	13.35
CAKKLC010000394.1	32453	33612	1160	+	RepeatMasker-4.0.1	transposable_element	115	NA	Cheshire DNA/hAT-Charlie 522 1681	42.2	2.7	2.7	115	#ff6666	0.000261833	0	22.45
CAKKLC010000394.1	35776	37512	1737	-	RepeatMasker-4.0.1	transposable_element	464	NA	Cheshire DNA/hAT-Charlie 429 2152	38.1	1.7	2.5	464	#ff6666	0.000261846	-0.556393	19.9
CAKKLC010000395.1	7	76	70	-	RepeatMasker-4.0.1	transposable_element	53	NA	tRNA-Gly-GGY tRNA 2 71	18.6	0	0	53	#f2f2f2	0.000261874	0	9.3
CAKKLC010000398.1	6961	8293	1333	-	RepeatMasker-4.0.1	transposable_element	30	NA	Charlie5 DNA/hAT-Charlie 485 2003	42.2	5.6	6	30	#ff6666	0.000261827	-0.0995357	23.9
CAKKLC010000398.1	11448	13200	1753	-	RepeatMasker-4.0.1	transposable_element	204	NA	Charlie8 DNA/hAT-Charlie 443 2186	42.3	4.3	4.9	204	#ff6666	0.000261813	-0.188445	23.3
CAKKLC010000403.1	1046	1141	96	+	RepeatMasker-4.0.1	transposable_element	73	NA	tRNA-Leu-TTG tRNA 1 83	8.6	0	15.7	73	#f2f2f2	0.000261803	0	4.3
CAKKLC010000403.1	12171	12329	159	-	RepeatMasker-4.0.1	transposable_element	35	NA	U1 snRNA 3 155	30.7	3.8	7.8	35	#f2f2f2	0.000261668	-1.03747	17.25
CAKKLC010000403.1	12555	12688	134	+	RepeatMasker-4.0.1	transposable_element	35	NA	U1 snRNA 3 140	31.8	4.5	1.4	35	#f2f2f2	0.000261667	1.6845	18.15
CAKKLC010000420.1	34594	36523	1930	+	RepeatMasker-4.0.1	transposable_element	57	NA	Charlie7 DNA/hAT-Charlie 350 2502	40.8	5.9	5.7	57	#ff6666	0.000261671	0.049753	23.35
CAKKLC010000420.1	38626	40372	1747	+	RepeatMasker-4.0.1	transposable_element	106	NA	Cheshire DNA/hAT-Charlie 495 2372	41	7.9	7.7	106	#ff6666	0.000261664	0.0369942	24.45
CAKKLC010000428.1	302	370	69	-	RepeatMasker-4.0.1	transposable_element	30	NA	tRNA-Ile-ATA tRNA 22 75	16.1	0	27.8	30	#f2f2f2	0.000261684	0	8.05
CAKKLC010000438.1	3486	3552	67	+	RepeatMasker-4.0.1	transposable_element	76	NA	tRNA-Phe-TTY tRNA 7 73	4.5	0	0	76	#f2f2f2	0.00026161	0	2.25
CAKKLC010000438.1	4007	5814	1808	-	RepeatMasker-4.0.1	transposable_element	101	NA	Charlie10 DNA/hAT-Charlie 605 2430	41	7.9	6.8	101	#ff6666	0.000261415	0.216318	24.45
CAKKLC010000438.1	10735	12796	2062	-	RepeatMasker-4.0.1	transposable_element	150	NA	Charlie10 DNA/hAT-Charlie 362 2616	39.6	8.3	9.3	150	#ff6666	0.000261438	-0.164119	23.95
CAKKLC010000439.1	19027	19404	378	-	RepeatMasker-4.0.1	transposable_element	37	NA	Cheshire DNA/hAT-Charlie 1815 2192	41.5	0.5	0.5	37	#ff6666	0.000261483	0	21
CAKKLC010000447.1	4552	5028	477	+	RepeatMasker-4.0.1	transposable_element	41	NA	Merlin1_HS DNA/Merlin 546 1025	38.7	5.2	4.6	41	#ff6666	0.000261564	0.176878	21.95
CAKKLC010000453.1	323	396	74	+	RepeatMasker-4.0.1	transposable_element	72	NA	tRNA-Asn-AAC tRNA 1 74	10.8	0	0	72	#f2f2f2	0.00026156	0	5.4
CAKKLC010000453.1	655	728	74	+	RepeatMasker-4.0.1	transposable_element	73	NA	tRNA-Asn-AAC tRNA 1 74	9.5	0	0	73	#f2f2f2	0.000261425	0	4.75
CAKKLC010000453.1	2659	2732	74	+	RepeatMasker-4.0.1	transposable_element	73	NA	tRNA-Asn-AAC tRNA 1 74	10.8	0	0	73	#f2f2f2	0.000261267	0	5.4
CAKKLC010000453.1	4699	4772	74	+	RepeatMasker-4.0.1	transposable_element	73	NA	tRNA-Asn-AAC tRNA 1 74	9.5	0	0	73	#f2f2f2	0.000261113	0	4.75
CAKKLC010000453.1	5031	5104	74	+	RepeatMasker-4.0.1	transposable_element	72	NA	tRNA-Asn-AAC tRNA 1 74	10.8	0	0	72	#f2f2f2	0.000260931	0	5.4
CAKKLC010000453.1	5365	5438	74	+	RepeatMasker-4.0.1	transposable_element	72	NA	tRNA-Asn-AAC tRNA 1 74	10.8	0	0	72	#f2f2f2	0.000260753	0	5.4
CAKKLC010000453.1	5689	5762	74	+	RepeatMasker-4.0.1	transposable_element	73	NA	tRNA-Asn-AAC tRNA 1 74	9.5	0	0	73	#f2f2f2	0.000260563	0	4.75
CAKKLC010000453.1	6022	6095	74	+	RepeatMasker-4.0.1	transposable_element	72	NA	tRNA-Asn-AAC tRNA 1 74	10.8	0	0	72	#f2f2f2	0.000260337	0	5.4
CAKKLC010000453.1	6354	6427	74	+	RepeatMasker-4.0.1	transposable_element	73	NA	tRNA-Asn-AAC tRNA 1 74	9.5	0	0	73	#f2f2f2	0.000260114	0	4.75
CAKKLC010000453.1	6680	6753	74	+	RepeatMasker-4.0.1	transposable_element	69	NA	tRNA-Asn-AAC tRNA 1 74	12.2	0	0	69	#f2f2f2	0.000259848	0	6.1
CAKKLC010000453.1	6955	7028	74	+	RepeatMasker-4.0.1	transposable_element	72	NA	tRNA-Asn-AAC tRNA 1 74	10.8	0	0	72	#f2f2f2	0.00025961	0	5.4
CAKKLC010000453.1	7257	7329	73	+	RepeatMasker-4.0.1	transposable_element	71	NA	tRNA-Asn-AAC tRNA 1 73	9.6	0	0	71	#f2f2f2	0.000259324	0	4.8
CAKKLC010000453.1	8432	10214	1783	-	RepeatMasker-4.0.1	transposable_element	147	NA	BLACKJACK DNA/hAT-Blackjack 765 2570	40.8	5.2	3.8	147	#ff6666	0.000258981	0.452512	23
CAKKLC010000453.1	15296	15894	599	+	RepeatMasker-4.0.1	transposable_element	138	NA	Cheshire DNA/hAT-Charlie 408 1293	36.4	0.9	5.2	138	#ff6666	0.000258969	-2.53051	18.65
CAKKLC010000453.1	16030	17058	1029	+	RepeatMasker-4.0.1	transposable_element	262	NA	Cheshire DNA/hAT-Charlie 1194 2222	39.5	1.8	1.8	262	#ff6666	0.000259035	0	20.65
CAKKLC010000476.1	3524	5389	1866	-	RepeatMasker-4.0.1	transposable_element	143	NA	Cheshire DNA/hAT-Charlie 436 2329	41.6	6.6	5	143	#ff6666	0.000259085	0.400538	24.1
CAKKLC010000476.1	6841	8901	2061	+	RepeatMasker-4.0.1	transposable_element	235	NA	Charlie10 DNA/hAT-Charlie 621 2787	39.6	7	7.5	235	#ff6666	0.000259079	-0.0995357	23.3
CAKKLC010000482.1	10278	10455	178	-	RepeatMasker-4.0.1	transposable_element	24	NA	OldhAT1 DNA/hAT-Ac 1391 1578	38.4	6.2	0.5	24	#ff6666	0.000259101	3.63227	22.3
CAKKLC010000482.1	10867	11325	459	-	RepeatMasker-4.0.1	transposable_element	17	NA	EuthAT-2 DNA/hAT-Ac 844 1307	36.3	11.8	10.6	17	#ff6666	0.000259115	0.154723	24.05
CAKKLC010000486.1	5483	6490	1008	-	RepeatMasker-4.0.1	transposable_element	52	NA	Charlie5 DNA/hAT-Charlie 633 1824	42.5	6.2	4.3	52	#ff6666	0.000259489	0.527932	24.35
CAKKLC010000486.1	8550	8957	408	+	RepeatMasker-4.0.1	transposable_element	48	NA	Merlin1_HS DNA/Merlin 553 969	39.5	4.9	2.6	48	#ff6666	0.000259471	0.91427	22.2
CAKKLC010000492.1	14147	14474	328	+	RepeatMasker-4.0.1	transposable_element	24	NA	Tigger10 DNA/TcMar-Tigger 591 932	38.6	8.8	4.4	24	#ff6666	0.000259465	1	23.7
CAKKLC010000525.1	37734	37800	67	+	RepeatMasker-4.0.1	transposable_element	32	NA	tRNA-Phe-TTY tRNA 1 67	23.9	0	0	32	#f2f2f2	0.000259577	0	11.95
CAKKLC010000528.1	6472	7121	650	-	RepeatMasker-4.0.1	transposable_element	100	NA	Tigger7 DNA/TcMar-Tigger 796 1478	39	2.8	1.7	100	#ff6666	0.000259519	0.719892	20.9
CAKKLC010000540.1	767	850	84	-	RepeatMasker-4.0.1	transposable_element	42	NA	tRNA-Ile-ATA tRNA 7 75	18.3	0	21.7	42	#f2f2f2	0.000259535	0	9.15
CAKKLC010000540.1	1432	2603	1172	+	RepeatMasker-4.0.1	transposable_element	96	NA	Cheshire DNA/hAT-Charlie 513 1665	43.1	4.3	6	96	#ff6666	0.000259374	-0.480626	23.7
CAKKLC010000543.1	55515	55595	81	+	RepeatMasker-4.0.1	transposable_element	24	NA	MER58C DNA/hAT-Charlie 1 79	21.3	3.7	4.1	24	#ff6666	0.000259355	-0.148099	12.5
CAKKLC010000543.1	56354	57338	985	+	RepeatMasker-4.0.1	transposable_element	251	NA	Cheshire DNA/hAT-Charlie 402 1360	38.7	0.7	3.4	251	#ff6666	0.000259288	-2.28011	19.7
CAKKLC010000545.1	8621	9359	739	+	RepeatMasker-4.0.1	transposable_element	71	NA	Cheshire DNA/hAT-Charlie 669 1401	43.3	1.6	2.5	71	#ff6666	0.000259383	-0.643856	22.45
CAKKLC010000545.1	9925	10092	168	+	RepeatMasker-4.0.1	transposable_element	17	NA	Cheshire DNA/hAT-Charlie 2021 2188	41.1	0	0	17	#ff6666	0.000259458	0	20.55
CAKKLC010000545.1	25243	25715	473	-	RepeatMasker-4.0.1	transposable_element	26	NA	Charlie12 DNA/hAT-Charlie 1032 1549	37.7	13.9	4	26	#ff6666	0.00025962	1.79701	25.8
CAKKLC010000545.1	32799	33831	1033	-	RepeatMasker-4.0.1	transposable_element	60	NA	Cheshire DNA/hAT-Charlie 622 1625	40.5	7.5	10.6	60	#ff6666	0.000260229	-0.499102	24
CAKKLC010000545.1	34566	34633	68	-	RepeatMasker-4.0.1	transposable_element	21	NA	MER58C DNA/hAT-Charlie 147 215	27.9	1.5	0	21	#ff6666	0.000260264	0	14.7
CAKKLC010000545.1	35047	36734	1688	-	RepeatMasker-4.0.1	transposable_element	123	NA	Cheshire DNA/hAT-Charlie 413 2083	42.3	4.8	5.4	123	#ff6666	0.000260238	-0.169925	23.55
CAKKLC010000545.1	57164	59104	1941	+	RepeatMasker-4.0.1	transposable_element	171	NA	Cheshire DNA/hAT-Charlie 451 2420	40.5	8.5	6.9	171	#ff6666	0.00026022	0.300866	24.5
CAKKLC010000545.1	71571	71932	362	+	RepeatMasker-4.0.1	transposable_element	38	NA	Merlin1_HS DNA/Merlin 552 923	37.3	8.8	5.9	38	#ff6666	0.0002603	0.576789	23.05
CAKKLC010000545.1	86944	88820	1877	+	RepeatMasker-4.0.1	transposable_element	171	NA	Cheshire DNA/hAT-Charlie 432 2333	41.6	6	4.6	171	#ff6666	0.000260444	0.383329	23.8
CAKKLC010000545.1	94620	94907	288	+	RepeatMasker-4.0.1	transposable_element	19	NA	Kanga1 DNA/TcMar-Tc2 637 930	43.9	2.4	0.3	19	#ff6666	0.000260435	3	23.15
CAKKLC010000565.1	20358	20866	509	-	RepeatMasker-4.0.1	transposable_element	63	NA	Tigger12 DNA/TcMar-Tigger 765 1519	41.8	3.6	4.1	63	#ff6666	0.00026047	-0.187627	22.7
CAKKLC010000565.1	28441	28507	67	-	RepeatMasker-4.0.1	transposable_element	76	NA	tRNA-Phe-TTY tRNA 7 73	4.5	0	0	76	#f2f2f2	0.000260468	0	2.25
CAKKLC010000565.1	82767	83294	528	+	RepeatMasker-4.0.1	transposable_element	27	NA	BLACKJACK DNA/hAT-Blackjack 1026 1551	44.8	1.9	2.3	27	#ff6666	0.000260005	-0.275634	23.35
CAKKLC010000576.1	1607	1935	329	+	RepeatMasker-4.0.1	transposable_element	22	NA	Tigger10 DNA/TcMar-Tigger 591 931	38.9	8.5	4.7	22	#ff6666	0.000260072	0.854802	23.7
CAKKLC010000576.1	6322	6446	125	-	RepeatMasker-4.0.1	transposable_element	13	NA	Tigger7 DNA/TcMar-Tigger 1235 1365	28.8	13.6	8.4	13	#ff6666	0.000260184	0.695145	21.2
CAKKLC010000592.1	11771	12142	372	-	RepeatMasker-4.0.1	transposable_element	28	NA	Merlin1_HS DNA/Merlin 620 1000	39	6.7	4.2	28	#ff6666	0.000261091	0.673772	22.85
CAKKLC010000593.1	11129	12157	1029	-	RepeatMasker-4.0.1	transposable_element	34	NA	Charlie5 DNA/hAT-Charlie 905 1951	43	5.6	3.8	34	#ff6666	0.000261125	0.559427	24.3
CAKKLC010000593.1	18374	18461	88	-	RepeatMasker-4.0.1	transposable_element	31	NA	5S rRNA 27 114	36.4	0	0	31	#f2f2f2	0.000261102	0	18.2
CAKKLC010000593.1	18607	18694	88	-	RepeatMasker-4.0.1	transposable_element	31	NA	5S rRNA 26 113	36.4	0	0	31	#f2f2f2	0.000261219	0	18.2
CAKKLC010000599.1	7086	8193	1108	-	RepeatMasker-4.0.1	transposable_element	94	NA	Tigger1 DNA/TcMar-Tigger 459 1505	39.1	6.4	4	94	#ff6666	0.000261338	0.678072	22.75
CAKKLC010000610.1	429	509	81	-	RepeatMasker-4.0.1	transposable_element	65	NA	tRNA-Leu-CTY tRNA 2 82	16.1	0	0	65	#f2f2f2	0.000261361	0	8.05
CAKKLC010000614.1	4074	4539	466	-	RepeatMasker-4.0.1	transposable_element	42	NA	Merlin1_HS DNA/Merlin 530 1006	39.4	3.9	1.5	42	#ff6666	0.000261179	1.37851	21.65
CAKKLC010000616.1	15342	16422	1081	+	RepeatMasker-4.0.1	transposable_element	29	NA	Charlie17 DNA/hAT-Charlie 679 2048	38.2	8.9	4.7	29	#ff6666	0.000261177	0.921145	23.55
CAKKLC010000616.1	18192	18293	102	+	RepeatMasker-4.0.1	transposable_element	14	NA	Charlie14a DNA/hAT-Charlie 669 770	38.2	0	0	14	#ff6666	0.000261341	0	19.1
CAKKLC010000616.1	21504	23469	1966	-	RepeatMasker-4.0.1	transposable_element	148	NA	Cheshire DNA/hAT-Charlie 418 2420	42.6	6.6	4.6	148	#ff6666	0.000261484	0.520832	24.6
CAKKLC010000622.1	24065	25189	1125	-	RepeatMasker-4.0.1	transposable_element	28	NA	Charlie8 DNA/hAT-Charlie 426 1576	42.9	7.7	5.3	28	#ff6666	0.00026148	0.538866	25.3
CAKKLC010000629.1	224	307	84	-	RepeatMasker-4.0.1	transposable_element	71	NA	tRNA-Leu-TTG tRNA 1 83	12	0	1.2	71	#f2f2f2	0.000261507	0	6
CAKKLC010000636.1	12352	14105	1754	+	RepeatMasker-4.0.1	transposable_element	221	NA	Charlie8 DNA/hAT-Charlie 441 2185	40.5	4.2	4.8	221	#ff6666	0.000261239	-0.192645	22.35
CAKKLC010000636.1	17656	19502	1847	+	RepeatMasker-4.0.1	transposable_element	133	NA	Cheshire DNA/hAT-Charlie 439 2312	41.9	7.8	5.3	133	#ff6666	0.00026123	0.557482	24.85
CAKKLC010000636.1	32889	34508	1620	+	RepeatMasker-4.0.1	transposable_element	131	NA	Charlie8 DNA/hAT-Charlie 522 2131	44.1	4.6	5.3	131	#ff6666	0.000261279	-0.204358	24.35
CAKKLC010000636.1	34884	34949	66	+	RepeatMasker-4.0.1	transposable_element	17	NA	MER58C DNA/hAT-Charlie 148 215	28.8	3	0	17	#ff6666	0.00026125	0	15.9
CAKKLC010000637.1	14898	15018	121	+	RepeatMasker-4.0.1	transposable_element	11	NA	Tigger3 DNA/TcMar-Tigger 1429 1550	38.8	0.8	0	11	#ff6666	0.000261227	0	19.8
CAKKLC010000660.1	11	82	72	+	RepeatMasker-4.0.1	transposable_element	50	NA	tRNA-Lys-AAG tRNA 1 73	19.4	1.4	0	50	#f2f2f2	0.000261333	0	10.4
CAKKLC010000663.1	12972	14681	1710	+	RepeatMasker-4.0.1	transposable_element	440	NA	Cheshire DNA/hAT-Charlie 407 2090	39	0.9	2.4	440	#ff6666	0.000261197	-1.41504	19.95
CAKKLC010000663.1	21076	22718	1643	-	RepeatMasker-4.0.1	transposable_element	99	NA	Charlie7 DNA/hAT-Charlie 600 2242	41.3	10	10	99	#ff6666	0.000261303	0	25.65
CAKKLC010000663.1	33493	34323	831	-	RepeatMasker-4.0.1	transposable_element	98	NA	Tigger1 DNA/TcMar-Tigger 710 1503	40.1	3.5	2.9	98	#ff6666	0.000261518	0.271302	21.8
CAKKLC010000663.1	48725	50176	1452	-	RepeatMasker-4.0.1	transposable_element	72	NA	Charlie12 DNA/hAT-Charlie 466 2260	41.7	7.5	5.9	72	#ff6666	0.000261521	0.346176	24.6
CAKKLC010000670.1	25699	27569	1871	-	RepeatMasker-4.0.1	transposable_element	151	NA	Cheshire DNA/hAT-Charlie 439 2336	42.2	7.2	5.6	151	#ff6666	0.000261563	0.36257	24.7
CAKKLC010000691.1	9567	10037	471	-	RepeatMasker-4.0.1	transposable_element	50	NA	Merlin1_HS DNA/Merlin 549 1028	44.2	3	1	50	#ff6666	0.000261587	1.58496	23.6
CAKKLC010000691.1	11772	12414	643	-	RepeatMasker-4.0.1	transposable_element	112	NA	Tigger1 DNA/TcMar-Tigger 815 1468	39	2.8	1.1	112	#ff6666	0.0002616	1.34792	20.9
CAKKLC010000691.1	26446	28260	1815	-	RepeatMasker-4.0.1	transposable_element	136	NA	Charlie7 DNA/hAT-Charlie 597 2429	41	6	5	136	#ff6666	0.000261618	0.263034	23.5
CAKKLC010000691.1	28980	29075	96	-	RepeatMasker-4.0.1	transposable_element	73	NA	tRNA-Leu-TTG tRNA 1 83	8.6	0	15.7	73	#f2f2f2	0.000261617	0	4.3
CAKKLC010000691.1	30542	32278	1737	+	RepeatMasker-4.0.1	transposable_element	126	NA	Cheshire DNA/hAT-Charlie 416 2130	43	5.3	6	126	#ff6666	0.000261238	-0.17897	24.15
CAKKLC010000691.1	32647	32715	69	+	RepeatMasker-4.0.1	transposable_element	16	NA	MER58C DNA/hAT-Charlie 147 215	33.3	0	0	16	#ff6666	0.000261209	0	16.65
CAKKLC010000691.1	32869	33413	545	-	RepeatMasker-4.0.1	transposable_element	25	NA	Charlie7 DNA/hAT-Charlie 584 1131	42.2	4.4	3.8	25	#ff6666	0.000261313	0.211504	23.3
CAKKLC010000691.1	34116	34211	96	-	RepeatMasker-4.0.1	transposable_element	73	NA	tRNA-Leu-TTG tRNA 1 83	8.6	0	15.7	73	#f2f2f2	0.000261293	0	4.3
CAKKLC010000691.1	46453	48141	1689	+	RepeatMasker-4.0.1	transposable_element	122	NA	Cheshire DNA/hAT-Charlie 452 2107	41.9	5.5	6.4	122	#ff6666	0.000260849	-0.21864	23.7
CAKKLC010000691.1	48535	48599	65	+	RepeatMasker-4.0.1	transposable_element	20	NA	MER58C DNA/hAT-Charlie 150 215	19.3	6.2	4.5	20	#ff6666	0.000260828	0.462343	12.75
CAKKLC010000696.1	430	568	139	+	RepeatMasker-4.0.1	transposable_element	25	NA	BLACKJACK DNA/hAT-Blackjack 1 131	29.1	2.2	8.4	25	#ff6666	0.000260977	-1.93289	15.65
CAKKLC010000696.1	1008	2962	1955	+	RepeatMasker-4.0.1	transposable_element	157	NA	BLACKJACK DNA/hAT-Blackjack 766 2725	41	5.2	4.9	157	#ff6666	0.000260943	0.0857299	23.1
CAKKLC010000696.1	4297	4429	133	-	RepeatMasker-4.0.1	transposable_element	14	NA	Tigger2 DNA/TcMar-Tigger 1513 1654	33.3	7.5	0.7	14	#ff6666	0.000260929	3.42146	20.4
CAKKLC010000696.1	6308	8077	1770	-	RepeatMasker-4.0.1	transposable_element	89	NA	Charlie10 DNA/hAT-Charlie 645 2716	40.6	6.8	6.1	89	#ff6666	0.000261121	0.156726	23.7
CAKKLC010000696.1	11254	11473	220	+	RepeatMasker-4.0.1	transposable_element	22	NA	Kanga1 DNA/TcMar-Tc2 738 961	44.8	2.3	0.5	22	#ff6666	0.000261159	2.20163	23.55
CAKKLC010000705.1	27308	27701	394	+	RepeatMasker-4.0.1	transposable_element	38	NA	HSMAR1 DNA/TcMar-Mariner 633 1030	42.1	1.5	0.5	38	#ff6666	0.000261218	1.58496	21.8
CAKKLC010000709.1	4908	5830	923	+	RepeatMasker-4.0.1	transposable_element	143	NA	Tigger1 DNA/TcMar-Tigger 564 1488	39.1	3.1	1.2	143	#ff6666	0.000261327	1.36923	21.1
CAKKLC010000714.1	897	1433	537	-	RepeatMasker-4.0.1	transposable_element	52	NA	Charlie8 DNA/hAT-Charlie 417 955	38.6	6	5.6	52	#ff6666	0.00026134	0.0995357	22.3
CAKKLC010000722.1	3041	3120	80	+	RepeatMasker-4.0.1	transposable_element	70	NA	tRNA-Ser-TCG tRNA 2 82	13.8	1.2	0	70	#f2f2f2	0.000261367	0	7.5
CAKKLC010000722.1	11418	13074	1657	+	RepeatMasker-4.0.1	transposable_element	219	NA	Charlie8 DNA/hAT-Charlie 432 2071	40.8	3	4.1	219	#ff6666	0.000261067	-0.450661	21.9
CAKKLC010000722.1	14955	15034	80	+	RepeatMasker-4.0.1	transposable_element	67	NA	tRNA-Ser-TCY tRNA 2 82	12.5	1.2	0	67	#f2f2f2	0.000261087	0	6.85
CAKKLC010000722.1	16559	16816	258	-	RepeatMasker-4.0.1	transposable_element	30	NA	Kanga2_a DNA/TcMar-Tc2 267 530	36.1	10.1	7.6	30	#ff6666	0.000260712	0.410284	23.1
CAKKLC010000722.1	17029	17234	206	-	RepeatMasker-4.0.1	transposable_element	23	NA	Kanga1 DNA/TcMar-Tc2 724 929	43.7	0	0	23	#ff6666	0.000261213	0	21.85
CAKKLC010000736.1	1415	1782	368	+	RepeatMasker-4.0.1	transposable_element	46	NA	Merlin1_HS DNA/Merlin 549 924	37.8	6.5	4.3	46	#ff6666	0.000261525	0.596103	22.15
CAKKLC010000736.1	19184	19652	469	+	RepeatMasker-4.0.1	transposable_element	30	NA	Merlin1_HS DNA/Merlin 528 1005	39.7	7	5	30	#ff6666	0.000261594	0.485427	23.35
CAKKLC010000738.1	9516	10969	1454	+	RepeatMasker-4.0.1	transposable_element	99	NA	Cheshire DNA/hAT-Charlie 673 2093	42.9	5.4	6.3	99	#ff6666	0.000261665	-0.222392	24.15
CAKKLC010000738.1	11377	11443	67	+	RepeatMasker-4.0.1	transposable_element	17	NA	MER58C DNA/hAT-Charlie 148 215	29.9	1.5	0	17	#ff6666	0.000261634	0	15.7
CAKKLC010000745.1	24391	24527	137	-	RepeatMasker-4.0.1	transposable_element	20	NA	Tigger2 DNA/TcMar-Tigger 1513 1658	36.5	6.6	0	20	#ff6666	0.000261617	0	21.55
CAKKLC010000745.1	51414	52481	1068	-	RepeatMasker-4.0.1	transposable_element	54	NA	Charlie5 DNA/hAT-Charlie 575 1816	42.7	5	4.3	54	#ff6666	0.000261717	0.217591	23.85
CAKKLC010000745.1	56612	57167	556	+	RepeatMasker-4.0.1	transposable_element	20	NA	HSMAR1 DNA/TcMar-Mariner 515 1072	42.7	4.7	4.3	20	#ff6666	0.000261687	0.128324	23.7
CAKKLC010000745.1	58938	59420	483	-	RepeatMasker-4.0.1	transposable_element	39	NA	Tigger7 DNA/TcMar-Tigger 647 1406	38.8	4.5	2.1	39	#ff6666	0.000261657	1.09954	21.65
CAKKLC010000751.1	661	1540	880	-	RepeatMasker-4.0.1	transposable_element	44	NA	Charlie5 DNA/hAT-Charlie 913 1816	42.9	6.6	3.8	44	#ff6666	0.000261652	0.796467	24.75
CAKKLC010000751.1	2335	2416	82	+	RepeatMasker-4.0.1	transposable_element	71	NA	tRNA-Ser-TCG tRNA 1 83	12.2	1.2	0	71	#f2f2f2	0.000261647	0	6.7
CAKKLC010000751.1	5527	5608	82	+	RepeatMasker-4.0.1	transposable_element	72	NA	tRNA-Ser-TCG tRNA 1 83	12.2	1.2	0	72	#f2f2f2	0.000261278	0	6.7
CAKKLC010000751.1	5783	5821	39	-	RepeatMasker-4.0.1	transposable_element	22	NA	UCON81 DNA/hAT-Charlie 46 84	17.9	0	0	22	#ff6666	0.000260842	0	8.95
CAKKLC010000751.1	6614	7274	661	-	RepeatMasker-4.0.1	transposable_element	42	NA	Charlie5 DNA/hAT-Charlie 1138 1816	42.4	6.2	3.4	42	#ff6666	0.000260465	0.866733	24.3
CAKKLC010000751.1	8378	8458	81	+	RepeatMasker-4.0.1	transposable_element	69	NA	tRNA-Ser-TCG tRNA 2 83	13.6	1.2	0	69	#f2f2f2	0.000260453	0	7.4
CAKKLC010000751.1	9464	10118	655	-	RepeatMasker-4.0.1	transposable_element	40	NA	Charlie5 DNA/hAT-Charlie 1145 1816	43.8	5.5	2.8	40	#ff6666	0.000259895	0.974005	24.65
CAKKLC010000751.1	11213	11293	81	+	RepeatMasker-4.0.1	transposable_element	69	NA	tRNA-Ser-TCG tRNA 2 83	13.6	1.2	0	69	#f2f2f2	0.000259831	0	7.4
CAKKLC010000751.1	16742	16798	57	+	RepeatMasker-4.0.1	transposable_element	13	NA	L2a LINE/L2 3262 3320	26.3	3.5	0	13	#3399ff	0.000259143	0	14.9
CAKKLC010000751.1	24707	24900	194	-	RepeatMasker-4.0.1	transposable_element	23	NA	Looper DNA/PiggyBac 1195 1389	38.7	2.1	1.5	23	#ff6666	0.000259048	0.485427	20.4
CAKKLC010000782.1	620	692	73	-	RepeatMasker-4.0.1	transposable_element	20	NA	X5a_DNA DNA/TcMar-Tigger 106 178	32.9	0	0	20	#ff6666	0.000259125	0	16.45
CAKKLC010000789.1	14463	16220	1758	+	RepeatMasker-4.0.1	transposable_element	81	NA	BLACKJACK DNA/hAT-Blackjack 826 2576	42.3	4.8	5.2	81	#ff6666	0.000259232	-0.115477	23.55
CAKKLC010000791.1	7653	8022	370	-	RepeatMasker-4.0.1	transposable_element	19	NA	Kanga1 DNA/TcMar-Tc2 568 948	42	5.1	2.1	19	#ff6666	0.000259191	1.28011	23.55
CAKKLC010000795.1	1744	2536	793	-	RepeatMasker-4.0.1	transposable_element	33	NA	Tigger10 DNA/TcMar-Tigger 515 1275	40.3	4.5	5	33	#ff6666	0.000259152	-0.152003	22.4
CAKKLC010000795.1	13296	13657	362	+	RepeatMasker-4.0.1	transposable_element	39	NA	Merlin1_HS DNA/Merlin 552 923	38.4	5.8	3	39	#ff6666	0.000259136	0.95109	22.1
CAKKLC010000795.1	16939	17811	873	-	RepeatMasker-4.0.1	transposable_element	70	NA	HSMAR1 DNA/TcMar-Mariner 113 1032	43.5	6.6	1.2	70	#ff6666	0.000259195	2.45943	25.05
CAKKLC010000795.1	26704	27634	931	-	RepeatMasker-4.0.1	transposable_element	255	NA	Cheshire DNA/hAT-Charlie 1242 2169	38.1	1.3	1.6	255	#ff6666	0.000259159	-0.29956	19.7
CAKKLC010000795.1	27704	28419	716	-	RepeatMasker-4.0.1	transposable_element	174	NA	Cheshire DNA/hAT-Charlie 381 1097	37.4	3.4	3.2	174	#ff6666	0.000259305	0.0874628	20.4
CAKKLC010000797.1	8150	9789	1640	-	RepeatMasker-4.0.1	transposable_element	92	NA	BLACKJACK DNA/hAT-Blackjack 832 2468	43.5	4.5	4.6	92	#ff6666	0.000259308	-0.0317089	24
CAKKLC010000797.1	10080	10193	114	-	RepeatMasker-4.0.1	transposable_element	22	NA	MER94 DNA/hAT-Blackjack 1 117	33.8	14.1	1.8	22	#ff6666	0.000259248	2.96963	23.95
CAKKLC010000814.1	15391	15756	366	-	RepeatMasker-4.0.1	transposable_element	37	NA	Merlin1_HS DNA/Merlin 549 923	38.5	6.8	4.3	37	#ff6666	0.000261866	0.661198	22.65
CAKKLC010000817.1	9449	9744	296	-	RepeatMasker-4.0.1	transposable_element	47	NA	Cheshire DNA/hAT-Charlie 1940 2233	36.8	3.7	4.4	47	#ff6666	0.000262045	-0.249978	20.25
CAKKLC010000823.1	338	2022	1685	-	RepeatMasker-4.0.1	transposable_element	107	NA	Charlie8 DNA/hAT-Charlie 402 2078	43.9	4.8	5.3	107	#ff6666	0.000262046	-0.142958	24.35
CAKKLC010000823.1	3777	4965	1189	-	RepeatMasker-4.0.1	transposable_element	39	NA	Cheshire DNA/hAT-Charlie 966 2077	42.2	7	5.6	39	#ff6666	0.000261992	0.321928	24.6
CAKKLC010000823.1	6504	7182	679	-	RepeatMasker-4.0.1	transposable_element	93	NA	Cheshire DNA/hAT-Charlie 433 1106	42.4	1.3	2.1	93	#ff6666	0.000262079	-0.691878	21.85
CAKKLC010000831.1	16480	17102	623	-	RepeatMasker-4.0.1	transposable_element	25	NA	Kanga1 DNA/TcMar-Tc2 586 1229	45.8	5.9	2.5	25	#ff6666	0.000262296	1.23879	25.85
CAKKLC010000831.1	18523	20219	1697	+	RepeatMasker-4.0.1	transposable_element	142	NA	Cheshire DNA/hAT-Charlie 419 2094	43	4.6	5	142	#ff6666	0.000262204	-0.120294	23.8
CAKKLC010000837.1	1058	1677	620	-	RepeatMasker-4.0.1	transposable_element	77	NA	Tigger1 DNA/TcMar-Tigger 715 1431	36.4	4.9	2.2	77	#ff6666	0.000262157	1.15528	20.65
CAKKLC010000842.1	3616	4614	999	+	RepeatMasker-4.0.1	transposable_element	35	NA	Charlie5 DNA/hAT-Charlie 902 1939	43.5	6.1	2.1	35	#ff6666	0.000262209	1.53842	24.8
CAKKLC010000845.1	43	153	111	+	RepeatMasker-4.0.1	transposable_element	25	NA	UCON16 Unknown 140 250	28.8	0	0	25	#f2f2f2	0.00026218	0	14.4
CAKKLC010000854.1	5777	6167	391	-	RepeatMasker-4.0.1	transposable_element	34	NA	Merlin1_HS DNA/Merlin 537 937	39.1	5.1	2.5	34	#ff6666	0.000262176	1.02857	22.1
CAKKLC010000854.1	19291	20180	890	+	RepeatMasker-4.0.1	transposable_element	210	NA	Cheshire DNA/hAT-Charlie 407 1272	37.9	1.5	4.3	210	#ff6666	0.000262199	-1.51937	19.7
CAKKLC010000854.1	20269	20511	243	+	RepeatMasker-4.0.1	transposable_element	84	NA	Cheshire DNA/hAT-Charlie 1406 1632	34.9	0	0	84	#ff6666	0.00026231	0	17.45
CAKKLC010000854.1	20560	21027	468	+	RepeatMasker-4.0.1	transposable_element	108	NA	Cheshire DNA/hAT-Charlie 1754 2221	38.3	2.4	2.4	108	#ff6666	0.000262536	0	20.35
CAKKLC010000854.1	28615	29392	778	+	RepeatMasker-4.0.1	transposable_element	63	NA	Kanga1 DNA/TcMar-Tc2 633 1425	43.2	6.2	4.2	63	#ff6666	0.000262584	0.561879	24.7
CAKKLC010000854.1	48008	48294	287	-	RepeatMasker-4.0.1	transposable_element	18	NA	Kanga1 DNA/TcMar-Tc2 639 931	42.6	3.1	1	18	#ff6666	0.00026257	1.63227	22.85
CAKKLC010000854.1	65744	66858	1115	-	RepeatMasker-4.0.1	transposable_element	108	NA	Cheshire DNA/hAT-Charlie 486 1617	41	6.5	5	108	#ff6666	0.000262592	0.378512	23.75
CAKKLC010000859.1	7337	7904	568	+	RepeatMasker-4.0.1	transposable_element	15	NA	Charlie24 DNA/hAT-Charlie 921 1454	43.7	2.9	1.5	15	#ff6666	0.000262667	0.95109	23.3
CAKKLC010000861.1	21	91	71	+	RepeatMasker-4.0.1	transposable_element	36	NA	tRNA-Thr-ACG tRNA 3 74	16.8	0.3	1.4	36	#f2f2f2	0.000262708	-2.22239	8.55
CAKKLC010000861.1	823	873	51	+	RepeatMasker-4.0.1	transposable_element	33	NA	tRNA-Thr-ACG tRNA 8 57	12	0	2	33	#f2f2f2	0.000262267	0	6
CAKKLC010000861.1	1297	1367	71	+	RepeatMasker-4.0.1	transposable_element	36	NA	tRNA-Thr-ACG tRNA 3 74	17.1	0.3	1.4	36	#f2f2f2	0.000261368	-2.22239	8.7
CAKKLC010000861.1	1772	1813	42	+	RepeatMasker-4.0.1	transposable_element	23	NA	tRNA-Thr-ACG tRNA 8 48	12.2	0	2.4	23	#f2f2f2	0.000260492	0	6.1
CAKKLC010000861.1	2185	3252	1068	+	RepeatMasker-4.0.1	transposable_element	118	NA	Cheshire DNA/hAT-Charlie 416 1486	41.5	6	5.7	118	#ff6666	0.000258441	0.0740006	23.75
CAKKLC010000861.1	3500	3868	369	+	RepeatMasker-4.0.1	transposable_element	17	NA	Charlie12 DNA/hAT-Charlie 1875 2409	40.6	4.5	6.6	17	#ff6666	0.000258467	-0.552541	22.55
CAKKLC010000862.1	15406	15671	266	+	RepeatMasker-4.0.1	transposable_element	10	NA	Tigger10 DNA/TcMar-Tigger 750 1014	36	6.8	7.2	10	#ff6666	0.000258431	-0.0824622	21.4
CAKKLC010000876.1	22748	23404	657	-	RepeatMasker-4.0.1	transposable_element	24	NA	Tigger2 DNA/TcMar-Tigger 1016 1549	39.3	5.5	4.3	24	#ff6666	0.000259113	0.355095	22.4
CAKKLC010000876.1	24460	26316	1857	-	RepeatMasker-4.0.1	transposable_element	474	NA	Cheshire DNA/hAT-Charlie 414 2235	37.7	2.1	4.1	474	#ff6666	0.000259234	-0.965235	19.9
CAKKLC010000878.1	73	158	86	-	RepeatMasker-4.0.1	transposable_element	12	NA	Ricksha DNA/MULE-MuDR 1508 1593	34.9	0	0	12	#ff6666	0.000259328	0	17.45
CAKKLC010000880.1	11715	12169	455	+	RepeatMasker-4.0.1	transposable_element	23	NA	HSMAR1 DNA/TcMar-Mariner 611 1071	40.9	5.3	3.9	23	#ff6666	0.000259681	0.442518	23.1
CAKKLC010000881.1	12746	14171	1426	+	RepeatMasker-4.0.1	transposable_element	148	NA	Tigger1 DNA/TcMar-Tigger 526 1954	40.4	1.5	2.6	148	#ff6666	0.000259685	-0.793549	20.95
CAKKLC010000881.1	31181	31557	377	-	RepeatMasker-4.0.1	transposable_element	43	NA	Merlin1_HS DNA/Merlin 551 936	37.1	5.8	3.4	43	#ff6666	0.000260064	0.770518	21.45
CAKKLC010000892.1	10244	11175	932	-	RepeatMasker-4.0.1	transposable_element	118	NA	Tigger5 DNA/TcMar-Tigger 701 1473	38.7	2.6	4.8	118	#ff6666	0.000260354	-0.884523	20.65
CAKKLC010000892.1	16319	18138	1820	+	RepeatMasker-4.0.1	transposable_element	129	NA	Charlie7 DNA/hAT-Charlie 592 2427	40.2	7.1	6.2	129	#ff6666	0.00026043	0.195551	23.65
CAKKLC010000894.1	15338	16416	1079	+	RepeatMasker-4.0.1	transposable_element	57	NA	Cheshire DNA/hAT-Charlie 562 1625	42.4	8.6	10.2	57	#ff6666	0.000260858	-0.246161	25.5
CAKKLC010000897.1	17	230	214	-	RepeatMasker-4.0.1	transposable_element	17	NA	Cheshire DNA/hAT-Charlie 834 1042	36.7	3.4	12.5	17	#ff6666	0.000261675	-1.87832	20.05
CAKKLC010000909.1	16808	18077	1270	-	RepeatMasker-4.0.1	transposable_element	333	NA	Cheshire DNA/hAT-Charlie 958 2223	37.7	2.3	2.6	333	#ff6666	0.000261678	-0.176878	20
CAKKLC010000920.1	4	76	73	-	RepeatMasker-4.0.1	transposable_element	54	NA	tRNA-Lys-AAG tRNA 1 73	17.8	0	0	54	#f2f2f2	0.000261739	0	8.9
CAKKLC010000920.1	283	355	73	-	RepeatMasker-4.0.1	transposable_element	54	NA	tRNA-Lys-AAG tRNA 1 73	17.8	0	0	54	#f2f2f2	0.00026011	0	8.9
CAKKLC010000925.1	22064	22316	253	+	RepeatMasker-4.0.1	transposable_element	22	NA	Tigger7 DNA/TcMar-Tigger 1117 1374	38.2	4.7	2.7	22	#ff6666	0.000256556	0.799701	21.45
CAKKLC010000925.1	34672	36429	1758	+	RepeatMasker-4.0.1	transposable_element	157	NA	Charlie8 DNA/hAT-Charlie 415 2163	42.6	5.2	5.8	157	#ff6666	0.00025676	-0.157541	23.9
CAKKLC010000925.1	41461	43331	1871	-	RepeatMasker-4.0.1	transposable_element	102	NA	Cheshire DNA/hAT-Charlie 438 2335	42.6	6.9	5.4	102	#ff6666	0.000256671	0.353637	24.75
CAKKLC010000925.1	75254	75999	746	+	RepeatMasker-4.0.1	transposable_element	11	NA	BLACKJACK DNA/hAT-Blackjack 812 1552	43.6	4.8	5.5	11	#ff6666	0.000257232	-0.196397	24.2
CAKKLC010000932.1	140	209	70	-	RepeatMasker-4.0.1	transposable_element	53	NA	tRNA-Gln-CAG tRNA 3 72	18.6	0	0	53	#f2f2f2	0.000256949	0	9.3
CAKKLC010000937.1	11925	13483	1559	+	RepeatMasker-4.0.1	transposable_element	122	NA	Charlie8 DNA/hAT-Charlie 531 2080	42.8	5.1	5.7	122	#ff6666	0.000244561	-0.160465	23.95
CAKKLC010000937.1	20342	20967	626	-	RepeatMasker-4.0.1	transposable_element	66	NA	Tigger7 DNA/TcMar-Tigger 735 1362	41.1	1.9	1.6	66	#ff6666	0.000243954	0.247928	21.5
CAKKLC010000937.1	21993	22614	622	-	RepeatMasker-4.0.1	transposable_element	30	NA	Kanga1 DNA/TcMar-Tc2 567 1204	45.5	4.3	1.7	30	#ff6666	0.000244882	1.3388	24.9
CAKKLC010000939.1	4	240	237	-	RepeatMasker-4.0.1	transposable_element	9	NA	Charlie7 DNA/hAT-Charlie 1071 1299	38.5	4.2	7.9	9	#ff6666	0.000242391	-0.911463	21.35
CAKKLC010000941.1	21798	21951	154	-	RepeatMasker-4.0.1	transposable_element	18	NA	Charlie8 DNA/hAT-Charlie 1953 2103	43.1	0	2	18	#ff6666	0.000242768	0	21.55
CAKKLC010000941.1	22214	23457	1244	-	RepeatMasker-4.0.1	transposable_element	106	NA	Cheshire DNA/hAT-Charlie 429 1655	42	5.1	6.6	106	#ff6666	0.000249266	-0.371969	23.55
CAKKLC010000941.1	28710	29039	330	-	RepeatMasker-4.0.1	transposable_element	38	NA	Tigger10 DNA/TcMar-Tigger 591 932	38.5	7	3.2	38	#ff6666	0.000248543	1.12928	22.75
CAKKLC010000941.1	36769	37949	1181	-	RepeatMasker-4.0.1	transposable_element	65	NA	Charlie8 DNA/hAT-Charlie 388 1576	42.8	6.5	5.8	65	#ff6666	0.00025335	0.164387	24.65
CAKKLC010000951.1	2283	4118	1836	+	RepeatMasker-4.0.1	transposable_element	146	NA	Cheshire DNA/hAT-Charlie 453 2305	42.1	4.6	3.7	146	#ff6666	0.000253701	0.314109	23.35
CAKKLC010000955.1	3349	3416	68	-	RepeatMasker-4.0.1	transposable_element	17	NA	MER58C DNA/hAT-Charlie 148 215	32.4	0	0	17	#ff6666	0.000252844	0	16.2
CAKKLC010000955.1	3790	3955	166	-	RepeatMasker-4.0.1	transposable_element	14	NA	Charlie8 DNA/hAT-Charlie 1967 2131	42.4	0	0.6	14	#ff6666	0.000249531	0	21.2
CAKKLC010000955.1	4278	5530	1253	-	RepeatMasker-4.0.1	transposable_element	133	NA	Cheshire DNA/hAT-Charlie 419 1667	42.6	4.5	4.8	133	#ff6666	0.000258547	-0.0931094	23.55
CAKKLC010000955.1	12999	13753	755	+	RepeatMasker-4.0.1	transposable_element	101	NA	Tigger1 DNA/TcMar-Tigger 231 1466	41.1	4.8	0.7	101	#ff6666	0.00025692	2.77761	22.95
CAKKLC010000955.1	26870	26992	123	+	RepeatMasker-4.0.1	transposable_element	31	NA	MER58B DNA/hAT-Charlie 2 118	29.1	2.4	7.7	31	#ff6666	0.000255453	-1.68182	15.75
CAKKLC010000955.1	27510	29053	1544	+	RepeatMasker-4.0.1	transposable_element	109	NA	Cheshire DNA/hAT-Charlie 524 2090	42.9	5.7	4.2	109	#ff6666	0.000258395	0.440573	24.3
CAKKLC010000956.1	13369	13447	79	-	RepeatMasker-4.0.1	transposable_element	8	NA	L1MC4 LINE/L1 6617 6697	36.7	2.5	0	8	#3399ff	0.000266923	0	19.6
CAKKLC010000956.1	13551	13633	83	-	RepeatMasker-4.0.1	transposable_element	7	NA	L1MC4 LINE/L1 6617 6699	37.4	0	0	7	#3399ff	0	0	18.7
