# Supplementary material
Source: Research Square preprint supplement (doi:10.21203/rs.3.rs-9162471/v1)
Supplement: Supplementary file 4 [file a90eb41edf36689f00d80028.xlsx]

## Sheet: Supplementary Table S1 - Edson
Transposable elements in a myxozoan–fish system: their role in the lateral transfer of host Siglec genes
Amr G. A. Ibrahim, Fábio S. R. Amaral, Edson A. Adriano
Supplementary Table S1: A detailed overview of transposable element (TE) distribution across the 14,586 assembled genomic scaffolds of Ceratonova shasta.
This file contains the full genome assembly of Ceratonova shasta (accession GCA_918559645.1), downloaded from the NCBI Assembly database. The assembly is provided
in FASTA format (.fna), representing the scaffold-level genome generated using the Velvet assembler. This genomic resource was used as the reference for all transposable element (TE)
detection, TE annotation, and comparative genomic analyses performed in this study. The assembly comprises 14,586 scaffolds with a total ungapped length of approximately 69.3 Mb
This genome was critical for mapping TE distributions, identifying insertion hotspots, and investigating the potential influence of TEs on gene structure and genome evolution in C. shasta
Data source from the link: NCBI Genome Database – GCA_918559645.1
scaffold_id,scaffold_length,te_coverage_bp,te_density
scaffold_02575,114114,59011,0.5171286748696301
scaffold_13067,87390,56255,0.64372375748549
scaffold_02896,546607,53567,0.09799955712414295
scaffold_13781,78372,48287,0.6161318288951635
scaffold_11050,66532,45375,0.682009663386012
scaffold_13334,85950,45082,0.5245149839590206
scaffold_08277,94075,42401,0.45072303594083246
scaffold_06892,339377,41724,0.12294463356339853
scaffold_06064,86298,41573,0.48174111846107426
scaffold_08407,57670,41003,0.7109999610115902
scaffold_06184,51200,40661,0.7941697167739028
scaffold_09132,55065,40585,0.737039809651878
scaffold_01935,117385,39247,0.33435062192616993
scaffold_01958,212203,38972,0.1836563990682822
scaffold_00708,40366,37810,0.9366893037954154
scaffold_02529,57980,36579,0.6308915462063323
scaffold_07552,49056,34549,0.704277449470972
scaffold_07956,61040,33889,0.5551935426831069
scaffold_05797,202392,33513,0.16558852744177424
scaffold_14323,40780,32600,0.7994257054165612
scaffold_14378,50858,32169,0.6325304419197001
scaffold_05960,57791,32118,0.5557621170873022
scaffold_04366,60933,31487,0.5167580612967992
scaffold_00502,48596,31267,0.6434239759633852
scaffold_05541,37310,30734,0.8237564643445254
scaffold_05221,41845,30519,0.7293394095779702
scaffold_11738,51202,29034,0.5670667784257795
scaffold_12752,68184,28737,0.4214679656551443
scaffold_12719,50298,28232,0.5613042624495426
scaffold_02106,35285,26193,0.7423489818002409
scaffold_03903,36420,25952,0.7125945593777283
scaffold_14300,88785,25138,0.283135511246577
scaffold_13519,124042,24990,0.20146491792207707
scaffold_07767,111145,24793,0.22307472226829145
scaffold_08249,282903,24022,0.08491560479816497
scaffold_08033,26732,23779,0.889561616419305
scaffold_13066,36815,23688,0.6434547578225996
scaffold_02036,134806,23446,0.17392593423534164
scaffold_03982,35198,23148,0.6576708567713525
scaffold_00210,500457,23117,0.046193024610867675
scaffold_07331,167990,23030,0.13709450807454737
scaffold_07069,33750,22744,0.6739074777332892
scaffold_13115,122462,22713,0.18547639952652167
scaffold_14553,35562,22491,0.6324640104278174
scaffold_06937,27886,22320,0.800435249300707
scaffold_05674,145684,22174,0.15220760719481785
scaffold_08166,178327,20897,0.11718770730680422
scaffold_02306,205233,20755,0.1011299360501528
scaffold_08178,30761,20666,0.6718536131861731
scaffold_03348,33147,20624,0.6222181616615372
scaffold_00007,32698,20522,0.6276287182610374
scaffold_01696,50348,20427,0.40572954860488647
scaffold_07875,145665,20417,0.14016876190510716
scaffold_07737,127058,20150,0.15859100282438635
scaffold_10719,29524,20030,0.6784364307497818
scaffold_06179,33179,19941,0.6010382568692871
scaffold_11165,74816,19815,0.2648519300748332
scaffold_12028,92810,19550,0.21064679949682216
scaffold_03242,153596,19491,0.12690004433930796
scaffold_06918,106149,19405,0.1828112690435837
scaffold_02710,32083,19110,0.595647952540387
scaffold_01616,226779,19065,0.08407004605542784
scaffold_07208,29364,18902,0.6437180622146814
scaffold_00479,197730,18634,0.09424301671397928
scaffold_13661,27829,18554,0.666734586337944
scaffold_13247,114733,18403,0.16040606270624794
scaffold_09361,27139,18104,0.6670934727040958
scaffold_12171,101662,18048,0.1775372633815362
scaffold_11612,111633,17838,0.15979249955068364
scaffold_05481,51627,17771,0.34423443086415395
scaffold_00283,32966,17762,0.5388105330941877
scaffold_01650,109917,17638,0.16047202621212261
scaffold_07061,31047,17599,0.566879961931751
scaffold_12636,25961,17249,0.6644442649322053
scaffold_08671,18866,17220,0.9127724969596287
scaffold_00655,107800,17056,0.1582219269646919
scaffold_10021,31376,17006,0.5420373017180751
scaffold_05830,25199,16857,0.6689687323163862
scaffold_05039,34498,16767,0.4860339717047053
scaffold_08096,116309,16740,0.14392988567436985
scaffold_04871,197251,16702,0.0846771390546503
scaffold_07873,153009,16690,0.10907956187807487
scaffold_00881,101958,16592,0.16274287575167473
scaffold_11505,45956,16398,0.3568258553206349
scaffold_12709,252949,16180,0.06396653334958981
scaffold_03717,240797,16099,0.0668580885641736
scaffold_01452,37898,16060,0.42378682771198584
scaffold_07784,112222,15909,0.1417695002595615
scaffold_09733,22551,15822,0.7016471193735039
scaffold_08603,109444,15681,0.1432868682759491
scaffold_04856,81829,15188,0.18560981304812427
scaffold_12432,31120,15042,0.48337587167295026
scaffold_13949,131026,14999,0.11448035624709288
scaffold_05809,125949,14819,0.11766280358722964
scaffold_04048,144002,14537,0.10095242123707299
scaffold_07715,23365,14482,0.6198486396097325
scaffold_02910,22216,14406,0.6484708583268401
scaffold_14563,29458,14226,0.48292994839087117
scaffold_11871,36708,14206,0.3870032031344065
scaffold_10458,115712,14186,0.12259950441269614
scaffold_12476,25629,14088,0.5496900152015158
scaffold_11853,21561,14057,0.6520049613562862
scaffold_13207,201977,13679,0.06772634856184119
scaffold_14498,79302,13586,0.17132890185059269
scaffold_01865,23511,13547,0.5762122011992241
scaffold_11564,33723,13274,0.39364053456099474
scaffold_07211,84196,13238,0.15723139992947543
scaffold_03959,18773,13225,0.7044735882128936
scaffold_01857,26133,13090,0.5009034528101298
scaffold_09803,78180,12833,0.16415165785737193
scaffold_09944,44241,12787,0.2890421085984359
scaffold_03381,66043,12638,0.19137094748241848
scaffold_10478,19604,12606,0.6430420199323802
scaffold_01166,91831,12576,0.13695243357646714
scaffold_09337,26102,12542,0.4805138766570566
scaffold_07958,65575,12528,0.19106237787191677
scaffold_06304,19020,12438,0.6539916652873622
scaffold_13445,225008,12367,0.05496399235091394
scaffold_02550,60242,12352,0.20504086199821267
scaffold_11339,283034,12337,0.04358928208885947
scaffold_11693,29163,12276,0.4209573238925062
scaffold_08040,73486,12136,0.16515429037443685
scaffold_01084,59403,12116,0.20397826856943324
scaffold_02578,16256,12070,0.7425244786613692
scaffold_03193,75962,12051,0.15865688695034466
scaffold_09693,102380,12023,0.11744423874912391
scaffold_00756,115712,11955,0.10331789177545225
scaffold_07725,35054,11888,0.3391548130469688
scaffold_07224,207154,11784,0.05688835251141501
scaffold_05205,85653,11780,0.13753473956854845
scaffold_06912,24519,11769,0.48002244343501294
scaffold_06618,83993,11721,0.1395530639712201
scaffold_06739,166456,11670,0.0701130170895342
scaffold_01454,111527,11604,0.10405465119925604
scaffold_11551,22107,11530,0.5215924532328753
scaffold_03050,20675,11509,0.5566991296182253
scaffold_13113,13996,11457,0.8186308051348727
scaffold_09088,53665,11445,0.2132684584480777
scaffold_04089,19292,11412,0.5915906822823063
scaffold_14349,17474,11368,0.6506096288047087
scaffold_06737,13017,11344,0.8715335475780581
scaffold_07758,79314,11327,0.1428178414140664
scaffold_00615,92494,11317,0.12236425792089121
scaffold_04931,18322,11214,0.6120815974758599
scaffold_11629,99705,11205,0.11239042364386259
scaffold_13639,36811,11171,0.30348815415366553
scaffold_08163,12694,11171,0.8800478949519452
scaffold_05112,103493,11148,0.10772369626661504
scaffold_04323,21255,11099,0.5222085082558299
scaffold_00815,16953,11082,0.6537285818878005
scaffold_08294,68084,11064,0.16251688774861092
scaffold_01365,20659,11003,0.5326401543761263
scaffold_07511,39888,10934,0.2741207003592676
scaffold_07625,128836,10894,0.08456354933304566
scaffold_04982,14250,10824,0.7596160160783412
scaffold_06244,14984,10798,0.7206939451022978
scaffold_04707,26591,10760,0.40466011639558946
scaffold_12795,99100,10710,0.10807857519645148
scaffold_11989,104325,10703,0.10259674707115363
scaffold_10392,21164,10653,0.5033838961201769
scaffold_00763,106096,10559,0.09952486525843934
scaffold_02990,88788,10554,0.11887709426432878
scaffold_06039,13151,10524,0.800301090891766
scaffold_07851,54334,10508,0.19340828164605803
scaffold_10320,58250,10486,0.18002834426080871
scaffold_03728,17743,10483,0.5908782274440456
scaffold_07167,47928,10380,0.21657939564464126
scaffold_08335,16944,10314,0.6087277858420617
scaffold_03313,60069,10255,0.1707265887339939
scaffold_13717,15304,10237,0.6689443865395663
scaffold_10774,24796,10222,0.4122616224974554
scaffold_03687,96977,10155,0.1047233622200678
scaffold_11268,12975,10120,0.7800303512355555
scaffold_06203,76902,10102,0.13136552132031312
scaffold_11843,12351,10085,0.8165353311563117
scaffold_11598,101524,10067,0.09916408062658955
scaffold_13673,95446,10019,0.10497230173768704
scaffold_03325,18484,9999,0.5409811139945138
scaffold_08479,70066,9937,0.14182349488679363
scaffold_09842,24377,9936,0.40760511748579725
scaffold_10421,17458,9870,0.5653800747915663
scaffold_06486,98530,9806,0.09952471552001087
scaffold_04717,86340,9701,0.11236102719120092
scaffold_12128,12622,9688,0.7675952282533811
scaffold_01492,105856,9679,0.09144121986291992
scaffold_00541,13398,9674,0.7220919464884192
scaffold_12246,168433,9669,0.05740800720770667
scaffold_12847,43352,9657,0.22276116237549465
scaffold_06593,28674,9578,0.3340634944155672
scaffold_06023,97794,9498,0.09712349749067851
scaffold_08343,109129,9495,0.08701158545092191
scaffold_14061,18038,9489,0.5261047457998498
scaffold_11219,10617,9473,0.8922662912161292
scaffold_07770,19927,9470,0.4752443397519893
scaffold_06863,50013,9374,0.18745073810510815
scaffold_02483,53692,9365,0.17442646567603398
scaffold_10454,20408,9295,0.4554791274042585
scaffold_02545,90405,9295,0.10281813965311477
scaffold_00324,60528,9280,0.15332763045460449
scaffold_10598,14205,9262,0.6520515904161885
scaffold_13939,20952,9240,0.4410301246302052
scaffold_11465,254057,9218,0.036286530567205655
scaffold_06284,16692,9105,0.5455001711988079
scaffold_03067,40373,9093,0.22523835809568277
scaffold_02230,16465,9049,0.5496046374842287
scaffold_00770,43258,9030,0.20875272044716686
scaffold_09569,65357,9020,0.138019724921747
scaffold_06959,120606,8997,0.07460300768727145
scaffold_07938,89548,8989,0.10038873153992707
scaffold_10231,15467,8977,0.580425435587093
scaffold_09024,14147,8972,0.6342002388481727
scaffold_04187,82363,8969,0.10889866486951057
scaffold_12045,36516,8947,0.24501674703819415
scaffold_03692,13458,8927,0.6633917747877636
scaffold_04284,15799,8915,0.5643124637263552
scaffold_12108,55346,8875,0.1603696286815925
scaffold_13268,12350,8864,0.7177403674711356
scaffold_14436,63486,8806,0.13871866941829972
scaffold_09455,12498,8804,0.7044834688923001
scaffold_12462,67581,8777,0.12988433575196565
scaffold_01292,97890,8733,0.08922150222276509
scaffold_04698,22631,8685,0.38379815855162125
scaffold_00328,12708,8654,0.6810348693803956
scaffold_02522,176718,8587,0.04859245369224233
scaffold_11455,91997,8519,0.0926084850396361
scaffold_13054,66194,8440,0.12750790073535584
scaffold_11227,127744,8440,0.06607639193663345
scaffold_09605,13747,8409,0.6117472073077312
scaffold_04318,19025,8399,0.44150483999017237
scaffold_01466,9960,8395,0.842895578926008
scaffold_09500,36249,8349,0.23032502296820367
scaffold_00623,47025,8348,0.17752524929252142
scaffold_09757,12435,8346,0.6712274248221523
scaffold_12914,148912,8259,0.05546750916137926
scaffold_10419,13710,8253,0.6019962467501199
scaffold_07169,18075,8247,0.4562843974342363
scaffold_10190,62328,8236,0.13214842573950022
scaffold_02366,30961,8201,0.2648945575566331
scaffold_10186,162256,8172,0.050366067097495304
scaffold_13459,12095,8164,0.6750491043526654
scaffold_06096,11919,8154,0.6841498919176197
scaffold_08312,125241,8146,0.06504420299150744
scaffold_05649,27927,8137,0.2913796506254899
scaffold_14520,15159,8126,0.5360933403535144
scaffold_05151,75432,8106,0.10747209763295161
scaffold_02312,42372,8099,0.19114912335146278
scaffold_13603,43484,8083,0.18590326447735783
scaffold_09628,87720,7998,0.09118704029342288
scaffold_13825,57631,7972,0.13833782990388227
scaffold_07152,11960,7931,0.6632052899326462
scaffold_00823,77550,7921,0.10214479902114229
scaffold_07872,48198,7884,0.16358891639159884
scaffold_04609,11199,7870,0.702776607280817
scaffold_08745,57613,7846,0.13619532065430426
scaffold_02731,21527,7824,0.36348254006736563
scaffold_08323,43009,7819,0.1818113706352461
scaffold_11060,13074,7814,0.5976850702266269
scaffold_04248,68560,7786,0.1135774203102745
scaffold_02121,88889,7783,0.08756557590676835
scaffold_07021,57437,7762,0.13514276281080526
scaffold_02201,42840,7762,0.1811882279203668
scaffold_06043,69038,7727,0.11193087963386106
scaffold_13317,80793,7670,0.09493487771103518
scaffold_01110,48866,7658,0.15672978986589006
scaffold_08727,217363,7645,0.035175927953623974
scaffold_06843,46411,7639,0.16460125043552803
scaffold_07685,16207,7627,0.4706111646719764
scaffold_06419,8864,7624,0.8601875331362436
scaffold_00434,11627,7598,0.6535535885169081
scaffold_03999,35315,7583,0.21473288374312932
scaffold_05037,67651,7518,0.11113787541844321
scaffold_02802,124448,7507,0.06032351930496507
scaffold_04852,104696,7506,0.07169638458432254
scaffold_03969,55179,7498,0.13589015919785008
scaffold_03583,49239,7498,0.15228189211790655
scaffold_07631,17810,7486,0.42035158169398784
scaffold_10885,13888,7483,0.538838638142547
scaffold_08503,47771,7435,0.15564603314874667
scaffold_02486,13787,7416,0.5379446771548639
scaffold_06317,79989,7414,0.09269828398101634
scaffold_11927,91844,7389,0.08045763638196204
scaffold_07465,61917,7385,0.11928647849499681
scaffold_08558,64728,7384,0.11408293794142839
scaffold_07479,49135,7381,0.1502205776552833
scaffold_02324,36658,7310,0.1994355001893369
scaffold_13467,9783,7303,0.7465314998198349
scaffold_00253,62730,7299,0.11636256491430724
scaffold_11998,13435,7286,0.5423855882603783
scaffold_11290,50958,7285,0.14296768634551718
scaffold_09158,9784,7262,0.7423188767324027
scaffold_00981,12619,7262,0.5754816382519662
scaffold_14005,96450,7259,0.07526601204075456
scaffold_11082,39207,7247,0.18486490116099116
scaffold_13226,300948,7224,0.024005888145109303
scaffold_05230,15514,7201,0.4641665918247836
scaffold_07808,38859,7190,0.18504983844565012
scaffold_00973,13477,7177,0.5326106485744413
scaffold_03456,57732,7168,0.12416011567685428
scaffold_00090,9099,7159,0.7868251702953042
scaffold_06856,37506,7132,0.1901695027495025
scaffold_01117,87913,7125,0.08105497447743569
scaffold_03870,16242,7121,0.4384342784259964
scaffold_01255,21444,7116,0.33184341447144006
scaffold_02528,10180,7101,0.6976394011416089
scaffold_13549,61514,7082,0.11514347424632831
scaffold_08228,67702,7067,0.10438697314882198
scaffold_03413,53630,7022,0.1309425770897613
scaffold_05036,86963,7001,0.08051050167968593
scaffold_03593,77992,6999,0.08974230321169863
scaffold_12194,12834,6987,0.5444817233473602
scaffold_13234,31013,6917,0.22306627428514544
scaffold_10647,51858,6908,0.13322847637695592
scaffold_07512,88063,6889,0.07822912990057064
scaffold_13139,10218,6881,0.67350505746726
scaffold_05536,98823,6875,0.0695726468577542
scaffold_00997,42498,6871,0.16168277936928818
scaffold_03435,75126,6861,0.0913388561577282
scaffold_14533,14465,6860,0.47426857019404944
scaffold_09524,66580,6857,0.10298991402658171
scaffold_02427,9764,6842,0.7008165163246336
scaffold_00204,17406,6836,0.39274799062193244
scaffold_01598,58046,6835,0.11775436758630485
scaffold_04990,86728,6833,0.07879400278241908
scaffold_14075,74242,6806,0.09168112252123116
scaffold_01875,23680,6794,0.2869459240826175
scaffold_04057,28414,6791,0.23901706382700838
scaffold_01427,57957,6784,0.117056425233466
scaffold_06759,58517,6783,0.11593045130307672
scaffold_03493,8915,6776,0.7601262034571876
scaffold_05582,16775,6758,0.4028780491932247
scaffold_13510,36365,6756,0.18579715243230727
scaffold_10948,12733,6754,0.5304840580365835
scaffold_01543,36081,6747,0.18701078891119552
scaffold_13265,19696,6745,0.34247981548774165
scaffold_03100,9856,6737,0.6836409292320966
scaffold_06731,36967,6712,0.18159370725376134
scaffold_14148,86822,6707,0.07726067923872593
scaffold_07005,11487,6691,0.5825297483020435
scaffold_00168,47866,6689,0.1397630641503351
scaffold_05955,9294,6653,0.7158810968172411
scaffold_02101,7721,6649,0.8612173256548694
scaffold_03702,28089,6643,0.2365032944876455
scaffold_07442,140176,6636,0.04734595203668486
scaffold_02193,55780,6627,0.11882279904296995
scaffold_13941,10245,6590,0.6433268378177983
scaffold_11069,28836,6560,0.22752330458378905
scaffold_01025,39068,6540,0.16740857128865635
scaffold_03994,12104,6528,0.5393646942706505
scaffold_06517,37452,6503,0.17364929978852103
scaffold_12310,47871,6468,0.13512140389185517
scaffold_07592,10194,6460,0.6337996983451464
scaffold_08501,99363,6448,0.06490082172031754
scaffold_14467,41359,6414,0.15509882369458095
scaffold_10613,25842,6402,0.2477622078649696
scaffold_07693,29484,6402,0.2171536957958089
scaffold_13811,50630,6398,0.1263810686036881
scaffold_05377,107624,6378,0.05926906352271536
scaffold_14136,9668,6355,0.6574255720895907
scaffold_02553,46405,6328,0.13637564960288442
scaffold_14125,64353,6316,0.09815707513950786
scaffold_01283,11496,6293,0.5474694637966692
scaffold_08679,8170,6273,0.7679195339733713
scaffold_04923,9945,6268,0.6302687996448131
scaffold_09908,79788,6267,0.07854917699413289
scaffold_00848,93560,6257,0.06688746899017173
scaffold_07260,93232,6247,0.06700619042708038
scaffold_02833,32063,6237,0.19454526558219
scaffold_03320,79543,6204,0.07800707016975927
scaffold_09522,53049,6191,0.1167197176833965
scaffold_02507,169213,6181,0.036532651684529
scaffold_12793,37019,6178,0.1668971935383049
scaffold_04244,11367,6166,0.5424774021650344
scaffold_03229,12522,6149,0.49105968232610636
scaffold_07993,35128,6135,0.17466628991295005
scaffold_01898,33469,6094,0.1821086460122462
scaffold_10381,82366,6091,0.0739610373741342
scaffold_01220,64484,6078,0.09426968660604994
scaffold_00489,37219,6074,0.1632148389771076
scaffold_09117,34050,6061,0.17802325447135714
scaffold_03462,47894,5998,0.12525165536801788
scaffold_12446,51766,5974,0.11542108269114132
scaffold_01133,34080,5972,0.17526208330926923
scaffold_06351,138131,5957,0.043128483380724204
scaffold_01930,51535,5941,0.11529875576460408
scaffold_00870,54844,5933,0.10819657066409878
scaffold_01134,8470,5927,0.6998605955806638
scaffold_09201,36208,5923,0.1636064408204433
scaffold_13130,15203,5906,0.3885241626818636
scaffold_01440,11871,5900,0.49706952637847723
scaffold_08197,10640,5853,0.5500985023610689
scaffold_05080,28960,5842,0.20173438402039123
scaffold_13809,32952,5799,0.17600542214719045
scaffold_13657,57859,5795,0.1001653519987293
scaffold_12205,29071,5793,0.19929913357216414
scaffold_00180,128567,5779,0.0449555007234323
scaffold_02974,53355,5765,0.10806416425561603
scaffold_07188,62690,5758,0.0918607752127437
scaffold_11164,83411,5754,0.06898403592000095
scaffold_12739,75276,5752,0.07641907309839202
scaffold_06041,15443,5735,0.37139260339815305
scaffold_06845,91993,5716,0.06213554791781406
scaffold_12111,8867,5715,0.6445623418498956
scaffold_08292,69761,5685,0.08149603465039135
scaffold_11324,33673,5661,0.16814241372323588
scaffold_01602,25587,5656,0.22105299589576868
scaffold_01149,33303,5653,0.16975528225366202
scaffold_13506,24864,5638,0.22676949732319854
scaffold_07546,8644,5637,0.6522225908586698
scaffold_13848,28456,5635,0.19804458594333324
scaffold_08167,39936,5631,0.1410131334102604
scaffold_09259,136223,5619,0.04125333456336107
scaffold_04913,13260,5604,0.42264706974425276
scaffold_11198,41471,5586,0.13470820453548807
scaffold_12953,62397,5581,0.08945647525966664
scaffold_08355,68332,5577,0.08161937841317946
scaffold_06328,10330,5571,0.5393500172577759
scaffold_05153,9152,5562,0.6078298125624013
scaffold_09111,45149,5559,0.12313761367189682
scaffold_07371,6315,5541,0.8775582311646879
scaffold_01708,48043,5531,0.11513877723669619
scaffold_02412,31117,5523,0.177500004762177
scaffold_08188,10495,5520,0.5259907379137138
scaffold_07199,41381,5520,0.13340247634550684
scaffold_00379,68034,5518,0.08111095403310577
scaffold_14170,60085,5511,0.09172010363700596
scaffold_01158,73345,5508,0.0750989669092401
scaffold_11444,8208,5497,0.6697761049847145
scaffold_07283,52068,5475,0.10516043719131668
scaffold_12060,6910,5474,0.7922836555875847
scaffold_13031,9064,5471,0.6037008271017588
scaffold_05472,7770,5469,0.7039625554113886
scaffold_11205,25303,5465,0.2159930530536836
scaffold_09788,36745,5463,0.14867742982822113
scaffold_00428,11195,5440,0.48596850794488405
scaffold_11457,49057,5428,0.11066213391822165
scaffold_12186,49349,5425,0.10994384428536248
scaffold_02110,10136,5424,0.5351773550145522
scaffold_10112,46030,5422,0.1178042031486622
scaffold_02735,53342,5418,0.10158866642327131
scaffold_00910,65901,5410,0.08209915098120485
scaffold_00618,11742,5408,0.46064977030434756
scaffold_09975,30284,5382,0.17771865365584477
scaffold_11482,7358,5367,0.7294680496145678
scaffold_00114,94456,5357,0.05671590779607086
scaffold_08132,9917,5343,0.5388593886297157
scaffold_01257,36574,5340,0.14601573156744732
scaffold_07097,127128,5338,0.04199270403096877
scaffold_00267,34853,5335,0.15309905003540458
scaffold_08629,10682,5313,0.4974187141493014
scaffold_13628,26568,5309,0.1998559593156505
scaffold_10540,46269,5294,0.11443401337379869
scaffold_07207,6888,5281,0.7667655497024126
scaffold_12020,6344,5274,0.8313393973781309
scaffold_11026,33448,5270,0.15756531218143852
scaffold_10775,53796,5256,0.09770936534468809
scaffold_05804,43594,5242,0.12026726384303199
scaffold_05722,38816,5241,0.13502873970401488
scaffold_10954,7182,5238,0.7294551171837778
scaffold_07517,41751,5225,0.12516801145302323
scaffold_01380,43968,5214,0.11860445746600375
scaffold_14234,7093,5208,0.7343514950324328
scaffold_00032,45376,5204,0.11469717061612461
scaffold_12471,28976,5200,0.1794704050302509
scaffold_10737,30031,5194,0.17296250559454135
scaffold_11271,46359,5187,0.11190404477099934
scaffold_05786,9990,5186,0.5191296403544324
scaffold_05965,25379,5185,0.20432766505050515
scaffold_10499,21955,5175,0.2357541695807778
scaffold_02837,48289,5173,0.10712817885737569
scaffold_09678,33101,5172,0.15627566466910386
scaffold_02336,9801,5147,0.5252160084137583
scaffold_02761,10461,5140,0.4913678163264713
scaffold_01772,37574,5128,0.13649091916314135
scaffold_10768,32687,5128,0.15689843046752022
scaffold_11758,39105,5112,0.13074641418481686
scaffold_08664,36199,5098,0.14083556617146237
scaffold_14059,64885,5097,0.07856284368172965
scaffold_03055,39416,5096,0.12930314470275314
scaffold_06646,42539,5095,0.11978718980376646
scaffold_08620,32905,5092,0.15477788324942685
scaffold_04239,28111,5079,0.18070474432203923
scaffold_01702,8840,5078,0.574458579125002
scaffold_02179,55733,5071,0.09099259950430028
scaffold_07333,84385,5071,0.06010154760777097
scaffold_10698,64760,5069,0.07827449815613752
scaffold_00285,63554,5067,0.07973623359874908
scaffold_06642,42446,5065,0.1193424926057236
scaffold_09410,25008,5052,0.20202251027750062
scaffold_11799,39150,5050,0.12900261000736568
scaffold_03921,45552,5021,0.11023427609875242
scaffold_02138,31534,5012,0.1589705887738619
scaffold_13481,61847,5002,0.08088262437248195
scaffold_05240,13432,4999,0.3721765104574538
scaffold_01050,25748,4995,0.19401118525819025
scaffold_06647,9542,4972,0.52107549384616
scaffold_07078,58210,4971,0.08541250673344351
scaffold_12594,173410,4947,0.028532946452270364
scaffold_02441,40115,4942,0.12322033463706841
scaffold_00678,40244,4939,0.12272910821032973
scaffold_09198,26821,4933,0.18393516081183242
scaffold_00495,30569,4913,0.1607349324160936
scaffold_03423,8193,4902,0.5984237239171568
scaffold_07635,45363,4895,0.10792030207571984
scaffold_06107,81259,4894,0.06023540934404689
scaffold_07516,8624,4891,0.5671397663635299
scaffold_01912,71508,4878,0.06822962513438045
scaffold_12086,31887,4868,0.15267197037305916
scaffold_06253,116478,4867,0.04178712708137199
scaffold_09400,10592,4866,0.45946353019661645
scaffold_13925,64724,4848,0.0749165828381847
scaffold_07948,12922,4847,0.3751690664216619
scaffold_11674,61458,4841,0.07877003000603719
scaffold_06381,58068,4827,0.08313149366426956
scaffold_14157,50422,4824,0.09567983081365385
scaffold_03335,26358,4803,0.18223469097251166
scaffold_13822,36686,4796,0.13075123605049643
scaffold_14106,75601,4791,0.06337235357519161
scaffold_03305,18416,4785,0.2598754596438232
scaffold_01261,9605,4781,0.49786039728777665
scaffold_08110,8085,4780,0.5912956683803461
scaffold_08534,25844,4777,0.18487075609258297
scaffold_01013,59297,4774,0.08052618125606681
scaffold_00987,29854,4773,0.15990283761416305
scaffold_14107,43603,4766,0.10931153444212352
scaffold_14140,7453,4766,0.639606834350861
scaffold_14251,81751,4757,0.05819649884005355
scaffold_09472,32578,4750,0.14583150943309572
scaffold_13959,31699,4739,0.14951836719987718
scaffold_08752,9402,4738,0.5039619076235047
scaffold_00435,29817,4735,0.1588060514474967
scaffold_00157,46117,4734,0.10266913235855538
scaffold_06846,8304,4726,0.5691330905865943
scaffold_00329,10394,4718,0.45397279414345726
scaffold_03981,25212,4700,0.18645597567642913
scaffold_11528,7886,4699,0.5959444180465232
scaffold_08970,29482,4694,0.15922407687848314
scaffold_08369,34604,4690,0.13554965409054925
scaffold_09344,8383,4688,0.5593092817530196
scaffold_08468,26418,4672,0.17688095172126922
scaffold_10439,34195,4671,0.13660518076857195
scaffold_08938,72339,4668,0.06453094041419907
scaffold_01393,55054,4668,0.08479500879237749
scaffold_09807,5936,4665,0.7860101232511529
scaffold_12747,52423,4659,0.08887393770327087
scaffold_01457,12137,4658,0.38385260460759096
scaffold_06709,28416,4655,0.16382194617244217
scaffold_12637,17036,4651,0.27305590848103756
scaffold_10333,47792,4651,0.09733611979639127
scaffold_11928,7055,4647,0.6587645645257371
scaffold_14249,8820,4643,0.5264284134940256
scaffold_12969,6745,4636,0.6874107192991079
scaffold_08950,9622,4635,0.48172289977188254
scaffold_04134,22613,4634,0.20494757967994506
scaffold_11593,80791,4611,0.05708552483989182
scaffold_09835,66080,4605,0.06969532577867722
scaffold_04668,36258,4590,0.12659723741823817
scaffold_10370,40855,4589,0.11234187431657838
scaffold_06730,41802,4581,0.10960592164793757
scaffold_13172,19484,4561,0.2341194470188932
scaffold_04207,8892,4544,0.5110835149574493
scaffold_11653,6771,4538,0.6703585850267253
scaffold_14373,34258,4527,0.13217261241957587
scaffold_07175,25579,4523,0.17683610785571574
scaffold_07400,25302,4515,0.1784645936627652
scaffold_01497,58326,4510,0.07734008033588156
scaffold_10565,77650,4506,0.05803957158505782
scaffold_09942,42695,4503,0.10547096684421707
scaffold_01828,26719,4490,0.16805466225003443
scaffold_01201,5712,4486,0.7855122374841386
scaffold_08896,57227,4483,0.0783505457742635
scaffold_07488,8547,4482,0.524420760269277
scaffold_02615,10082,4471,0.4435616329042381
scaffold_06324,23560,4463,0.18944045860107195
scaffold_07550,36890,4462,0.12096271772711938
scaffold_08297,52517,4460,0.08494304352019232
scaffold_11814,32252,4455,0.13814142999760323
scaffold_11175,10866,4441,0.40879567235152514
scaffold_12165,31889,4439,0.13920736266633407
scaffold_09666,22677,4424,0.19512929054921374
scaffold_05811,18469,4424,0.23956264803318486
scaffold_00023,5330,4420,0.8294204219997086
scaffold_00964,11508,4413,0.3834724238173148
scaffold_10064,41690,4406,0.10569648399054948
scaffold_04113,31906,4403,0.1380039740583457
scaffold_02478,28111,4394,0.15633546453362604
scaffold_03300,19241,4390,0.22819872603557773
scaffold_13853,29182,4385,0.15029757273404953
scaffold_02243,52666,4383,0.08323491360197163
scaffold_13291,38142,4375,0.11472492537318345
scaffold_06405,9189,4373,0.47592981835621756
scaffold_13686,28730,4372,0.1521756698362624
scaffold_00221,79031,4368,0.05528131113901348
scaffold_11892,56240,4362,0.07756647394222911
scaffold_11945,55344,4360,0.07878511092499849
scaffold_08739,28962,4356,0.15042191502841076
scaffold_13761,48098,4333,0.09010619711419819
scaffold_11368,38643,4327,0.11198914221508716
scaffold_03591,17713,4325,0.2441880521584531
scaffold_07256,43640,4311,0.09880195457759178
scaffold_11692,40740,4307,0.1057337599413438
scaffold_07092,36774,4306,0.11710087593632837
scaffold_13770,5501,4303,0.7823251652769236
scaffold_04286,6272,4303,0.6861085623978271
scaffold_00202,9633,4301,0.44657967531882914
scaffold_11270,21672,4301,0.1984659641442793
scaffold_14257,13485,4294,0.31844961304671376
scaffold_02533,9572,4292,0.4484572620161467
scaffold_10619,22872,4290,0.1875662832840037
scaffold_06573,64319,4287,0.06666048808001601
scaffold_03395,52420,4281,0.08168255462297176
scaffold_11860,5085,4274,0.8405788165932129
scaffold_08405,24905,4260,0.17108442821595712
scaffold_11266,25323,4260,0.16826301549704192
scaffold_07574,29158,4256,0.14597942245964643
scaffold_13671,41762,4232,0.10135401513467789
scaffold_05995,13853,4228,0.3052121302575787
scaffold_09269,41969,4224,0.10064603840982067
scaffold_13409,57810,4218,0.07297518370525136
scaffold_05236,58798,4205,0.07151947457171386
scaffold_01559,29473,4202,0.14259751855030187
scaffold_02625,8036,4202,0.5229917742689854
scaffold_02298,26421,4201,0.159021774142376
scaffold_10460,36796,4194,0.11398345156943712
scaffold_12778,22529,4187,0.18585461071492507
scaffold_03004,47345,4182,0.08833097982609239
scaffold_04888,33909,4180,0.12327481971546457
scaffold_11281,63728,4173,0.06548964602383349
scaffold_09109,30911,4168,0.13484217104707488
scaffold_08010,16934,4161,0.24576654386743188
scaffold_06133,46273,4160,0.08990205203634838
scaffold_05637,59973,4159,0.06935715009489483
scaffold_12903,29034,4155,0.1431322485912438
scaffold_03259,20416,4155,0.20355434516389798
scaffold_03346,34688,4155,0.1198092964389975
scaffold_11720,39852,4148,0.10409366385291688
scaffold_00826,28115,4147,0.147532778208044
scaffold_09584,6790,4141,0.6098839120823498
scaffold_00809,22179,4133,0.18637649461078326
scaffold_11751,10674,4132,0.3871744155426104
scaffold_03531,29641,4126,0.13922504528340063
scaffold_00373,28040,4124,0.14708204388334034
scaffold_03432,24723,4121,0.16671480802159044
scaffold_05945,8879,4108,0.4627752190237351
scaffold_03216,41696,4107,0.09850850881239659
scaffold_04355,7983,4092,0.5126038122419411
scaffold_03461,37604,4088,0.10871875945402767
scaffold_08450,7324,4085,0.5578196296367368
scaffold_02641,43095,4083,0.09475383386089653
scaffold_12888,4984,4078,0.81832471914644
scaffold_05962,61473,4074,0.06628804671000468
scaffold_11160,42908,4073,0.09494206104709432
scaffold_04986,34995,4066,0.11621114176121244
scaffold_10303,47342,4066,0.08588606132134965
scaffold_05695,38301,4063,0.10608834736145561
scaffold_10820,38042,4059,0.1067034528023704
scaffold_07507,6289,4058,0.6452589562439958
scaffold_11683,51140,4053,0.07926342265942293
scaffold_12172,7670,4052,0.5283700476027771
scaffold_13663,31900,4051,0.12699070251289385
scaffold_12771,23331,4045,0.17339336545690473
scaffold_01230,69747,4045,0.05799918489884636
scaffold_02090,28084,4043,0.14397954769749777
scaffold_13062,66472,4031,0.06065054414153718
scaffold_09190,33940,4030,0.11874548960372085
scaffold_04656,65246,4028,0.061737187291049295
scaffold_05456,26354,4026,0.15279519045113604
scaffold_05176,42690,4018,0.09413395752949257
scaffold_01325,5310,4018,0.7567884931339843
scaffold_06903,8159,4015,0.4921676357029787
scaffold_10201,6975,4015,0.5757102223089268
scaffold_02472,83838,4014,0.047882490765635735
scaffold_10224,8237,4010,0.48683289275130526
scaffold_13924,37019,4008,0.10827053456734058
scaffold_01520,45475,3999,0.0879455946230668
scaffold_10409,19653,3999,0.20352959543298904
scaffold_10950,71664,3996,0.05577065186137377
scaffold_11124,7166,3994,0.5573724590016342
scaffold_08690,5863,3987,0.6800626880516015
scaffold_12845,65425,3983,0.06088964189090647
scaffold_14426,54368,3983,0.07327720789166388
scaffold_05086,79986,3981,0.049777753569254256
scaffold_03496,50120,3980,0.0794291164498897
scaffold_03366,51221,3977,0.07765385763574034
scaffold_06587,27375,3972,0.14511551771674408
scaffold_09676,29190,3972,0.13607601990387644
scaffold_14220,27435,3961,0.1443782768817082
scaffold_14542,25166,3958,0.15727986452724319
scaffold_08032,29802,3957,0.13279097739276322
scaffold_03190,44159,3949,0.08944610983460605
scaffold_05985,33140,3945,0.11904919676849789
scaffold_10831,27530,3943,0.1432301251824077
scaffold_00642,36418,3940,0.10819012131825455
scaffold_05648,32268,3938,0.12205377103909515
scaffold_06075,38131,3930,0.10308641381751381
scaffold_13954,44156,3930,0.08900347991120555
scaffold_13037,45950,3915,0.08521590987082751
scaffold_12158,11491,3914,0.34063731197847413
scaffold_13379,25749,3913,0.15198820863466658
scaffold_13849,5863,3909,0.6668453199794288
scaffold_08356,15473,3907,0.25252753876856676
scaffold_06018,6206,3905,0.6293363452026666
scaffold_04872,25138,3903,0.155283570442666
scaffold_11633,90347,3902,0.04319938928253277
scaffold_12024,19713,3902,0.19798785624665152
scaffold_08810,12342,3901,0.3161006997106125
scaffold_00925,20621,3900,0.1891684087349088
scaffold_06821,53661,3898,0.07265856709134427
scaffold_08974,24206,3886,0.16057226922055984
scaffold_13912,26909,3879,0.14417323262219237
scaffold_11654,36838,3875,0.10521731856319888
scaffold_08783,20338,3858,0.18973748747413022
scaffold_01015,39464,3857,0.09773728663412332
scaffold_05935,36612,3855,0.1053066568580468
scaffold_10301,48484,3849,0.07939857860896218
scaffold_02153,5040,3849,0.7638085984019265
scaffold_10298,32517,3845,0.11825764140047033
scaffold_13668,31435,3843,0.12226636354445825
scaffold_14010,48161,3842,0.0797875900091034
scaffold_04021,66431,3841,0.05782121005518459
scaffold_05710,47977,3840,0.08004765806658837
scaffold_12294,33604,3839,0.11426442164394324
scaffold_08643,19381,3837,0.19799266147922281
scaffold_14519,24395,3813,0.15633189601078146
scaffold_00026,5614,3810,0.6787154355311007
scaffold_00768,41149,3803,0.09242132124345218
scaffold_11625,67023,3800,0.05670596390846144
scaffold_02637,6178,3792,0.6138469596121139
scaffold_08658,35506,3782,0.10652674903168265
scaffold_03581,62927,3779,0.06006361842665742
scaffold_12035,23546,3778,0.16048427193385859
scaffold_09445,27474,3777,0.13750456428829014
scaffold_07639,27520,3766,0.13685370564112648
scaffold_13117,39871,3760,0.09431717550127805
scaffold_14174,48101,3752,0.07801450123169579
scaffold_07684,31280,3749,0.11986146205404005
scaffold_03787,7184,3748,0.5217847443805659
scaffold_08733,6984,3748,0.5366732554731075
scaffold_05977,35738,3746,0.10484098518297935
scaffold_07382,7899,3744,0.47406104612341426
scaffold_00651,45195,3736,0.08266527975094827
scaffold_14030,29210,3732,0.12776562276593148
scaffold_05627,7284,3731,0.5122703817044785
scaffold_11942,12693,3722,0.293263631319264
scaffold_14164,34963,3718,0.10636785784489991
scaffold_09670,6785,3717,0.5478490693379348
scaffold_04578,43680,3713,0.08501787015698065
scaffold_12650,25918,3711,0.14320541120035088
scaffold_10338,34483,3711,0.10762159531246068
scaffold_03535,60780,3709,0.06102867970724338
scaffold_04933,30989,3694,0.11923386642269879
scaffold_09974,10143,3685,0.36337934735297334
scaffold_06017,67123,3683,0.05488045895369958
scaffold_12646,34022,3680,0.10817855161418098
scaffold_11228,29800,3679,0.12348190697080363
scaffold_06988,60434,3679,0.060882072784710986
scaffold_02712,30910,3674,0.11888390911535072
scaffold_07441,40860,3660,0.089588302876906
scaffold_03213,36340,3639,0.1001454278102234
scaffold_10090,29953,3638,0.12146383454282235
scaffold_04083,36843,3637,0.0987168513734814
scaffold_04531,6013,3634,0.6045164210818137
scaffold_08184,5814,3624,0.6233310379674117
scaffold_11792,29919,3621,0.12105831940787647
scaffold_00855,27027,3621,0.13399041642571427
scaffold_10040,53253,3620,0.06799320940121006
scaffold_08701,33204,3618,0.10898247630031249
scaffold_01372,38332,3609,0.0941668704423658
scaffold_10469,21345,3609,0.16912137133359328
scaffold_13615,96991,3607,0.037194203288031316
scaffold_08019,62642,3607,0.057591839509978066
scaffold_07665,14355,3605,0.2511327877376558
scaffold_03524,34718,3604,0.10381960179590743
scaffold_04456,6950,3603,0.5184679478346446
scaffold_05862,21453,3600,0.16784129505402584
scaffold_02252,30133,3597,0.11937779114171454
scaffold_01414,66039,3592,0.054396951102268734
scaffold_10027,6599,3592,0.5444742209842799
scaffold_06575,5946,3589,0.6036316460627301
scaffold_09564,26076,3586,0.13754034875424795
scaffold_14033,18110,3574,0.19736991513287094
scaffold_12226,24395,3572,0.14643258660834943
scaffold_08932,6076,3568,0.587349282803203
scaffold_05589,20402,3564,0.17473641080145352
scaffold_10531,31223,3560,0.1140359255634539
scaffold_01995,7493,3556,0.47458272000649604
scaffold_01016,6232,3553,0.570152101825568
scaffold_12382,84911,3553,0.0418543161154744
scaffold_06048,30929,3549,0.11476410301555309
scaffold_13373,6380,3543,0.5554186633247853
scaffold_13866,30322,3542,0.11682764252312527
scaffold_03498,4639,3534,0.7618062390382614
scaffold_13446,24669,3530,0.14311864230692026
scaffold_01388,32010,3529,0.11027711369327027
scaffold_12089,21658,3522,0.1626396137778988
scaffold_08972,29009,3520,0.12136004842596004
scaffold_05851,6580,3514,0.5340926946853785
scaffold_01240,34685,3502,0.10098726538781033
scaffold_10712,62269,3499,0.05619824649891969
scaffold_02652,30429,3496,0.11489110430100394
scaffold_09965,33090,3495,0.10564581026855738
scaffold_00968,42665,3492,0.08186139148526571
scaffold_09630,56849,3491,0.0614174804913351
scaffold_03128,23908,3490,0.14601469007275716
scaffold_00142,23590,3488,0.14788631010304554
scaffold_06366,41974,3486,0.08305345419139595
scaffold_13266,18987,3486,0.1836250974079891
scaffold_12253,84289,3485,0.04134701015491744
scaffold_10262,14385,3485,0.24232573900165308
scaffold_08448,69670,3485,0.05002458129430468
scaffold_02717,10411,3480,0.3342690388132076
scaffold_06267,5367,3478,0.6481499666048576
scaffold_02515,4228,3477,0.8224576298445472
scaffold_12729,5216,3467,0.6647309050586863
scaffold_03344,21504,3466,0.16120883164218702
scaffold_05271,23131,3466,0.14986273960337312
scaffold_12742,29883,3464,0.1159197802493066
scaffold_04179,43308,3463,0.07997316845692673
scaffold_06906,6940,3462,0.4988776853590937
scaffold_12528,24339,3461,0.1422287153799447
scaffold_14155,9821,3460,0.3523086467894314
scaffold_07603,8799,3459,0.39315439902561256
scaffold_09035,4745,3456,0.7283896212352619
scaffold_13024,81868,3456,0.04222067422909
scaffold_12993,23393,3455,0.1477270381098301
scaffold_13875,5741,3447,0.6005821458792108
scaffold_02304,6636,3447,0.5195172511959527
scaffold_05753,26086,3446,0.13212952672482822
scaffold_06224,46904,3442,0.07340122411536236
scaffold_04474,9443,3441,0.36441218798123387
scaffold_11732,92496,3441,0.037203695964366415
scaffold_14213,19843,3440,0.17340189541166864
scaffold_13831,8944,3439,0.3845570472045904
scaffold_07627,18436,3439,0.1865701871869277
scaffold_06362,18953,3437,0.18134931146044891
scaffold_12361,31199,3435,0.11010615117871524
scaffold_11142,28704,3434,0.11963759013859956
scaffold_03625,47922,3430,0.07159077501640695
scaffold_07410,20252,3426,0.16919080985467883
scaffold_07861,57817,3417,0.05911257052641347
scaffold_05370,33081,3415,0.10324326626472838
scaffold_03373,28032,3410,0.12167285728732598
scaffold_10471,9217,3406,0.3695482744069804
scaffold_04785,134089,3406,0.025406546377220004
scaffold_11554,19182,3404,0.17750810371652914
scaffold_03234,48713,3401,0.06983413242918524
scaffold_02291,39604,3399,0.08583137841474561
scaffold_11968,31348,3398,0.10841848226112015
scaffold_14374,53748,3398,0.06322994961233433
scaffold_11070,8025,3397,0.4233792266108681
scaffold_14418,19303,3392,0.17576583535273105
scaffold_10932,45294,3388,0.07482135185552011
scaffold_10682,5511,3385,0.6144006697083771
scaffold_02028,21736,3381,0.1555564100876085
scaffold_13981,23815,3380,0.1419610985371765
scaffold_04643,3749,3377,0.9008746464515807
scaffold_11065,22589,3376,0.14947160327007492
scaffold_04289,30060,3368,0.11204952930828656
scaffold_13693,42603,3366,0.0790116074637025
scaffold_14159,21909,3363,0.15351886731331044
scaffold_00758,6135,3359,0.5475527296837982
scaffold_04912,24109,3357,0.13925240302703232
scaffold_04758,22860,3357,0.14687303329943882
scaffold_14007,4438,3356,0.7563494817738239
scaffold_13046,30748,3356,0.10914851887253543
scaffold_01162,76813,3355,0.04367907462597098
scaffold_03088,21221,3352,0.15797275889721843
scaffold_02482,38687,3350,0.08660373932342143
scaffold_00584,74969,3349,0.044682984621734284
scaffold_14383,36158,3343,0.09247396410768623
scaffold_01977,18938,3341,0.17644927782104972
scaffold_01956,25574,3340,0.13063902242669956
scaffold_10245,34415,3328,0.0967220728433993
scaffold_11839,46643,3327,0.07133070783531603
scaffold_02305,53895,3324,0.06168316757088106
scaffold_05784,60953,3323,0.05452382896632536
scaffold_13733,30138,3323,0.11026544333421927
scaffold_00249,40886,3322,0.08125995685772781
scaffold_11789,33679,3322,0.09864652677129854
scaffold_05070,6954,3317,0.47701131213064546
scaffold_13052,32721,3311,0.10120665563728988
scaffold_04088,5409,3306,0.6112667707263284
scaffold_11618,14526,3305,0.2275263577486536
scaffold_01813,34019,3300,0.09700982307494223
scaffold_07071,20889,3300,0.1579985968745631
scaffold_00710,37637,3299,0.08766057017740224
scaffold_14097,11205,3296,0.29419773734470755
scaffold_02827,21944,3295,0.15015911087165074
scaffold_00945,45070,3295,0.07311095082435745
scaffold_13640,5590,3290,0.5886354678719113
scaffold_12949,53106,3285,0.06186549830931205
scaffold_01925,59213,3280,0.055404892314942215
scaffold_08883,15953,3274,0.20528354884158598
scaffold_01703,10527,3274,0.3110317888428057
scaffold_07476,39198,3271,0.08345124873537076
scaffold_07755,5244,3268,0.6232413699131132
scaffold_11542,18635,3268,0.175404603600811
scaffold_12144,33638,3266,0.09710640589795519
scaffold_14537,6604,3262,0.4940548022405961
scaffold_05101,16891,3259,0.1929947734841746
scaffold_01182,26119,3258,0.12477461496442621
scaffold_05367,25232,3257,0.12911794350445094
scaffold_06289,27962,3254,0.11640255958160924
scaffold_01686,20439,3251,0.15907555147999508
scaffold_03309,40677,3250,0.07992145100552202
scaffold_12631,49768,3245,0.06520470855290819
scaffold_09556,54730,3242,0.05924561249247345
scaffold_12975,19453,3240,0.16656338119454994
scaffold_13691,52164,3239,0.062101860778363716
scaffold_01344,20512,3233,0.157637288245276
scaffold_06919,40179,3232,0.0804598415706703
scaffold_13366,17694,3228,0.1824728971878562
scaffold_14247,30479,3225,0.1058237320270371
scaffold_14392,20779,3224,0.15517830612356817
scaffold_14465,43781,3223,0.0736170146176824
scaffold_03554,100094,3223,0.03220909999912844
scaffold_09880,38379,3222,0.0839654231733325
scaffold_06767,63749,3221,0.050537275268846694
scaffold_13803,92055,3221,0.03499621076648796
scaffold_00668,29875,3219,0.10777410277888405
scaffold_04528,12291,3219,0.26194096839182845
scaffold_09418,7794,3212,0.41223894722668813
scaffold_05333,6684,3210,0.4802977775451088
scaffold_05581,48066,3206,0.06670474921180651
scaffold_13262,4449,3204,0.720215288583262
scaffold_08560,19843,3203,0.16143277751355892
scaffold_04227,46285,3199,0.06912544649101493
scaffold_02855,21196,3198,0.15090048218307248
scaffold_06564,28736,3194,0.11115039443307556
scaffold_11752,28836,3189,0.11062109097502935
scaffold_06165,32706,3187,0.09745722979672951
scaffold_14453,4391,3183,0.7249344874270127
scaffold_10121,99092,3182,0.03212038957354503
scaffold_07391,22911,3178,0.1387219188410488
scaffold_05260,55665,3177,0.05708252794268649
scaffold_07232,37237,3171,0.08516354139167145
scaffold_04092,27027,3170,0.11729036426545734
scaffold_12800,33807,3166,0.09365657377981368
scaffold_01496,54574,3165,0.05801009938998156
scaffold_08460,33105,3161,0.09549551207355526
scaffold_13953,41638,3157,0.07582612348558232
scaffold_07544,24809,3156,0.12723550118800295
scaffold_03897,26164,3155,0.120597751450563
scaffold_09435,31290,3154,0.1007994499511159
scaffold_11630,42969,3153,0.07339236654417713
scaffold_05387,24865,3151,0.1267628303535928
scaffold_05659,25698,3151,0.12265325756357415
scaffold_10582,141726,3151,0.02223475839933182
scaffold_01001,26350,3148,0.11949547246545358
scaffold_06968,4478,3143,0.7019068722674187
scaffold_07358,3725,3142,0.8436371383944699
scaffold_12829,8527,3142,0.36851298376322633
scaffold_04281,60587,3141,0.05184578878260152
scaffold_09249,24240,3138,0.12946589168497785
scaffold_10330,17650,3137,0.17774544499418535
scaffold_01036,32493,3127,0.09625568309304194
scaffold_07955,24896,3127,0.12560614482035687
scaffold_00048,17475,3124,0.17877843453749465
scaffold_04472,22939,3122,0.1361289454056884
scaffold_12612,36409,3120,0.08571535308472526
scaffold_07996,69691,3118,0.04475417301143667
scaffold_08688,25749,3115,0.12099855167873536
scaffold_08491,22471,3108,0.13832205587569288
scaffold_12614,31845,3105,0.09751372796893043
scaffold_10026,28948,3103,0.10720124592595609
scaffold_02176,60322,3102,0.05142937825186611
scaffold_14172,28301,3102,0.10962021800578864
scaffold_11024,14868,3097,0.20832352750651092
scaffold_13111,22584,3094,0.13701132079935835
scaffold_02859,20245,3091,0.1526816882045638
scaffold_11294,44399,3091,0.06964056345138941
scaffold_08799,22191,3091,0.13930550213484885
scaffold_10973,44218,3085,0.06976816523615297
scaffold_02456,29281,3080,0.105215279770737
scaffold_06009,19304,3080,0.15959443788695454
scaffold_02072,21663,3079,0.14214800586268592
scaffold_08199,69408,3079,0.04436526283973663
scaffold_04729,33230,3076,0.09257024111846819
scaffold_11957,25896,3074,0.11872074824638015
scaffold_01526,18151,3074,0.16941040860717405
scaffold_02356,6724,3073,0.4570813079595744
scaffold_06211,16004,3071,0.19193979567779415
scaffold_11990,38360,3069,0.08002790364119157
scaffold_01761,35170,3064,0.08712651357896656
scaffold_05156,4851,3063,0.6315623643888482
scaffold_05847,164839,3062,0.01857657296693255
scaffold_10765,31815,3062,0.09625439652052743
scaffold_04329,37772,3057,0.08093439622424742
scaffold_01937,6664,3056,0.4586992844504006
scaffold_04343,50920,3054,0.05998344128847073
scaffold_13793,14583,3051,0.2092401434812422
scaffold_04622,39006,3048,0.07816268798400665
scaffold_09467,27457,3040,0.11072504310265381
scaffold_12656,34123,3031,0.08885150163714205
scaffold_01527,47170,3030,0.06423582552344399
scaffold_03072,37912,3029,0.07991668594299382
scaffold_13621,27607,3028,0.1096910896392718
scaffold_13749,70572,3019,0.04278915369057792
scaffold_06658,31051,3015,0.09712390906752498
scaffold_10630,43158,3015,0.0698673927372458
scaffold_05812,27732,3015,0.10873569352600934
scaffold_11353,31734,3014,0.09499875893376425
scaffold_12587,27006,3011,0.111523722166699
scaffold_08066,5477,3008,0.5493202741343766
scaffold_07648,57147,3005,0.052597877897466776
scaffold_07288,17270,3003,0.1739129924341667
scaffold_06014,18270,3000,0.16424063311772588
scaffold_09899,34045,2997,0.08803956793221474
scaffold_08850,10970,2997,0.2732357604636922
scaffold_10280,20488,2996,0.1462523626928455
scaffold_07731,31297,2990,0.09555325889720351
scaffold_08942,44810,2987,0.0666656705327699
scaffold_07846,28517,2985,0.10467911104747935
scaffold_01024,64262,2984,0.04643984491706313
scaffold_14227,42843,2974,0.0694291436807415
scaffold_10389,43212,2972,0.06877731909360729
scaffold_13090,50569,2966,0.058669036151423784
scaffold_04626,22333,2959,0.1325272006601658
scaffold_13043,39557,2959,0.0748081852106637
scaffold_08922,7874,2955,0.3753068463955165
scaffold_04002,4734,2951,0.6233696979917134
scaffold_13132,21150,2949,0.13947025819523845
scaffold_03877,15368,2948,0.19183841325182893
scaffold_04152,19022,2945,0.1548530452818465
scaffold_05671,98410,2944,0.0299183921781036
scaffold_06329,26120,2944,0.11274110057326608
scaffold_11557,8161,2944,0.36078873345055185
scaffold_13897,20160,2943,0.1459831431461183
scaffold_06162,13986,2943,0.21046510687863368
scaffold_05940,71525,2943,0.04115582806907678
scaffold_05873,7574,2942,0.3884574677871604
scaffold_12561,4425,2942,0.6648811704517394
scaffold_07261,53123,2941,0.055374223897113106
scaffold_05943,4921,2936,0.596631121779277
scaffold_03096,22819,2933,0.1285560802645507
scaffold_01966,5473,2926,0.5346488712826329
scaffold_02888,26004,2925,0.11250529730973198
scaffold_10276,9751,2922,0.2997575461346561
scaffold_10081,45179,2918,0.06459488113563025
scaffold_03640,8513,2918,0.3427939185157559
scaffold_01906,8411,2918,0.34696260385882216
scaffold_03297,36742,2914,0.07931569548626877
scaffold_13721,20978,2914,0.13891204143085395
scaffold_04970,28094,2913,0.1037173482240062
scaffold_12228,4400,2907,0.6608076397811425
scaffold_02442,25790,2905,0.11264636519325309
scaffold_10847,22564,2905,0.12875910387128642
scaffold_02095,17102,2904,0.16981165951396443
scaffold_04217,45614,2901,0.06360051903577664
scaffold_12079,36743,2894,0.07877112428274112
scaffold_03214,30573,2891,0.09457566467828118
scaffold_11932,67020,2890,0.04312694512190238
scaffold_10002,3406,2889,0.8484384291268858
scaffold_07388,7167,2888,0.4030798995559684
scaffold_09120,25663,2888,0.11257281632127752
scaffold_09095,21157,2887,0.13649154081936818
scaffold_00522,9434,2886,0.3059376114517992
scaffold_11667,13512,2884,0.21344832683940723
scaffold_01137,20483,2882,0.14073217743339658
scaffold_00652,18994,2882,0.1517836182162679
scaffold_11906,108700,2881,0.02650424369161407
scaffold_10875,26981,2878,0.10667473124784657
scaffold_01675,34148,2876,0.08425067253291252
scaffold_13178,53459,2871,0.05371721612466673
scaffold_04542,50728,2871,0.05659833782646854
scaffold_12572,6772,2866,0.4233073592505033
scaffold_05384,37102,2865,0.07723986204870781
scaffold_10447,12435,2862,0.23016783650172373
scaffold_02686,7182,2860,0.3982644708366024
scaffold_01011,23882,2857,0.1196698766621986
scaffold_03684,21484,2857,0.13298347584022352
scaffold_07113,23787,2855,0.1200408963018475
scaffold_06711,17802,2855,0.16038896591831803
scaffold_00262,4576,2854,0.6236981924938652
scaffold_01767,66512,2853,0.04290263948189764
scaffold_03749,27300,2845,0.10421468902150831
scaffold_07343,13656,2844,0.20826340235571764
scaffold_03291,26963,2842,0.1054293157902233
scaffold_01847,22446,2835,0.12633724344856243
scaffold_09138,17333,2832,0.1634390008407247
scaffold_08661,78209,2832,0.036213198170871846
scaffold_01886,6879,2832,0.411794854695952
scaffold_10179,30053,2831,0.09420149220376393
scaffold_06507,22523,2831,0.12570927418363095
scaffold_08885,39560,2830,0.07155631378708337
scaffold_12658,10739,2826,0.26316290147702776
scaffold_00426,25396,2825,0.11124266505602419
scaffold_12891,15969,2821,0.17669086653551255
scaffold_05886,36560,2819,0.07713208741697608
scaffold_09732,19691,2815,0.14300838774786773
scaffold_00863,31477,2811,0.08931265082623047
scaffold_02149,4342,2808,0.6468344971656763
scaffold_03228,22016,2808,0.12758332702737285
scaffold_13604,24766,2807,0.11336957900109033
scaffold_12392,69057,2807,0.040661403665704615
scaffold_06429,24918,2806,0.11263187997247492
scaffold_13966,3990,2805,0.7030342131015561
scaffold_05298,12217,2802,0.2293781320251549
scaffold_14299,37168,2801,0.07538511985555597
scaffold_01210,40114,2800,0.06980675306961999
scaffold_09776,33020,2799,0.0847915170332838
scaffold_01996,17751,2799,0.15773344028522937
scaffold_07367,39087,2798,0.07160501179680867
scaffold_13526,11480,2798,0.24377741425130364
scaffold_06068,18337,2795,0.15247813435264124
scaffold_00680,22604,2790,0.12343804283307946
scaffold_09131,21262,2789,0.13118003889521826
scaffold_03513,38348,2788,0.07272515856000084
scaffold_13738,18777,2786,0.14838574947438632
scaffold_11251,22926,2779,0.12125791585182916
scaffold_07984,47436,2778,0.058577798465691014
scaffold_13584,24821,2773,0.1117471222772811
scaffold_08567,21516,2773,0.12891558536533662
scaffold_12477,3771,2773,0.7355636735502027
scaffold_09130,16209,2772,0.17102513076864137
scaffold_13577,36550,2766,0.07570437226257805
scaffold_06614,68595,2765,0.04032248309791774
scaffold_14385,28047,2763,0.09854880243683996
scaffold_14212,38243,2760,0.07217540104869445
scaffold_08941,26856,2752,0.10247458151689433
scaffold_11685,20322,2752,0.13544003586221276
scaffold_08324,35232,2752,0.07812958386051402
scaffold_12053,18017,2750,0.15267505030086445
scaffold_07118,3171,2750,0.8672586840594445
scaffold_00235,64391,2747,0.04267356617968664
scaffold_12863,9324,2745,0.294421812090104
scaffold_14118,33600,2744,0.08167644814486008
scaffold_08036,53234,2743,0.051534041398251
scaffold_00740,16601,2742,0.1651710187238521
scaffold_11643,30074,2742,0.09118089503038737
scaffold_12104,18671,2738,0.14667518990305914
scaffold_02929,32655,2730,0.08361373315793998
scaffold_04586,20573,2730,0.13272681010716547
scaffold_03246,12411,2726,0.21967256740229596
scaffold_10356,107721,2725,0.025298468381496797
scaffold_03810,13003,2720,0.2091853026483481
scaffold_07300,18879,2717,0.14393916893474687
scaffold_05738,26754,2715,0.10148598171982207
scaffold_08695,4715,2714,0.5756397106200691
scaffold_02219,61063,2713,0.044435747185956026
scaffold_05771,47388,2712,0.057244835740885264
scaffold_03837,21703,2710,0.12490433214989903
scaffold_00421,58273,2707,0.04646741660377843
scaffold_08330,4231,2704,0.6391049495314594
scaffold_06628,28184,2703,0.09592109655210229
scaffold_06533,31211,2703,0.08661099555223889
scaffold_11477,20037,2696,0.13457360213885802
scaffold_07971,33419,2695,0.08066983697255323
scaffold_05410,18812,2695,0.14330877268979453
scaffold_03284,14069,2693,0.19144304738780035
scaffold_08387,34758,2689,0.0773781872650454
scaffold_01002,14907,2689,0.18043760807346068
scaffold_04085,23704,2687,0.11338882106371756
scaffold_11471,23025,2684,0.11660534935937072
scaffold_07415,76615,2682,0.03501887906704013
scaffold_00307,22770,2682,0.11779495147876283
scaffold_02335,14306,2679,0.18732198528335123
scaffold_03846,13278,2678,0.2017420911677983
scaffold_01483,39041,2677,0.06858483472368061
scaffold_08851,46299,2677,0.057837322020592975
scaffold_01929,18419,2676,0.145310032024398
scaffold_10752,18389,2674,0.1454512663729465
scaffold_06458,16239,2673,0.1646134824938837
scaffold_08198,59445,2671,0.044936399610362485
scaffold_07932,24714,2670,0.10806021218266988
scaffold_14324,3609,2669,0.7396468757369805
scaffold_05560,12458,2666,0.2140088989249719
scaffold_06973,48747,2665,0.05468029461865237
scaffold_03120,35828,2665,0.07439954021696596
scaffold_11827,36935,2665,0.07215783265524066
scaffold_13544,18646,2660,0.14266297613204607
scaffold_14336,18084,2659,0.1470886707212174
scaffold_04392,13146,2658,0.20226371889343084
scaffold_05687,22163,2657,0.11991777789865897
scaffold_09765,5874,2655,0.45206917770712624
scaffold_07599,16206,2655,0.16384527631661336
scaffold_08546,49590,2651,0.053470140372573804
scaffold_07569,20168,2650,0.13141299483380506
scaffold_08608,40245,2649,0.06583090603830453
scaffold_04133,17755,2648,0.14918935050223728
scaffold_11180,6090,2645,0.43436721798400213
scaffold_08332,19382,2643,0.13639533207099902
scaffold_04115,34737,2641,0.07604133094032858
scaffold_08685,13987,2641,0.18882465099911022
scaffold_13845,41707,2639,0.06329748615810891
scaffold_07657,30453,2637,0.08659681050985868
scaffold_12734,56864,2637,0.0463874011204405
scaffold_03444,33069,2631,0.07957492709580348
scaffold_11631,29517,2629,0.08907605449501259
scaffold_04604,23719,2629,0.11086831500753756
scaffold_12761,19774,2626,0.13283293990328482
scaffold_14470,3964,2626,0.6625487908035324
scaffold_06781,20792,2625,0.12627870863171872
scaffold_02424,4665,2623,0.5624681066212892
scaffold_02422,20000,2621,0.1310983474034861
scaffold_03174,12472,2620,0.21013390175506297
scaffold_04326,17044,2619,0.15368952198010544
scaffold_02283,20598,2619,0.127174589554249
scaffold_04620,4329,2618,0.6048304949378756
scaffold_01027,5144,2616,0.5086645390082021
scaffold_12367,3631,2614,0.7201830037100587
scaffold_04400,15235,2613,0.1715530204603848
scaffold_01449,21719,2610,0.12017832445732346
scaffold_11537,31844,2606,0.08186418245245558
scaffold_10283,17165,2606,0.1518394570274361
scaffold_03718,78394,2606,0.03324242612916714
scaffold_00929,32165,2605,0.08100152327112596
scaffold_11788,18657,2604,0.13957800636479692
scaffold_11509,20374,2602,0.12774394209010662
scaffold_14024,16873,2600,0.15410909200417822
scaffold_00021,28532,2598,0.09106378049116048
scaffold_06250,16447,2593,0.15771572015405483
scaffold_12311,34962,2591,0.07412776811011278
scaffold_02496,13041,2591,0.19871737847076967
scaffold_00004,30566,2590,0.08474106592639291
scaffold_02159,22879,2590,0.11321703976346885
scaffold_05363,5294,2589,0.48909455947444674
scaffold_13850,19235,2588,0.13458408262634866
scaffold_01375,28722,2587,0.09009522603773738
scaffold_09950,23406,2587,0.11053315738812758
scaffold_14534,14738,2586,0.17547657771811667
scaffold_01876,26234,2585,0.09856711392829055
scaffold_10704,22621,2584,0.11424171087108659
scaffold_09877,47827,2583,0.05401900429591812
scaffold_08956,17343,2583,0.14896213009487927
scaffold_04971,30776,2580,0.08384800649414266
scaffold_04404,7467,2579,0.34542354850779666
scaffold_05190,39238,2575,0.06563408205575759
scaffold_05909,36520,2573,0.07048068500420367
scaffold_13078,45524,2572,0.0564998141549393
scaffold_08217,29219,2570,0.08798046576397829
scaffold_05225,166506,2569,0.015431800194411417
scaffold_10107,9658,2569,0.26605769583581806
scaffold_13210,22209,2565,0.11552847723788373
scaffold_03989,49421,2563,0.051874102286823764
scaffold_03932,30750,2561,0.08331408398576917
scaffold_14524,20424,2560,0.12536251892542366
scaffold_10546,8418,2559,0.3040092509716906
scaffold_03612,5618,2556,0.4549940687327435
scaffold_02010,15140,2555,0.16881771067543475
scaffold_05913,22229,2555,0.11496551622687115
scaffold_05937,21428,2553,0.11916950941439326
scaffold_08134,44315,2553,0.0576258171009479
scaffold_12796,5061,2550,0.5039287443165483
scaffold_09295,51209,2547,0.04974986662000298
scaffold_00477,9817,2545,0.2593235913129121
scaffold_06525,18838,2544,0.1350494415888345
scaffold_14275,30022,2544,0.08475545986579251
scaffold_14039,13555,2543,0.1876328511615526
scaffold_07036,21348,2542,0.11909652006236678
scaffold_09331,26711,2541,0.09515931073863003
scaffold_12296,22576,2540,0.11252779822872255
scaffold_09005,4079,2536,0.6217756640348734
scaffold_12044,12989,2536,0.195317830892258
scaffold_12999,31303,2535,0.08098851872930231
scaffold_08172,22396,2534,0.11316480449011007
scaffold_00954,27792,2529,0.09103140595874806
scaffold_13561,5224,2519,0.4823123601433463
scaffold_07696,28190,2519,0.08936966462042027
scaffold_09808,15864,2517,0.15872385968902364
scaffold_03564,20610,2514,0.12202578289180332
scaffold_02620,28197,2514,0.08915970717168889
scaffold_01594,14541,2513,0.17286588109022624
scaffold_06128,29665,2512,0.08470545988125953
scaffold_00395,20238,2510,0.12405664387247198
scaffold_13752,4602,2505,0.5444314687378662
scaffold_02635,37796,2505,0.06629426155877807
scaffold_00074,32131,2503,0.07792257685237336
scaffold_11499,3680,2502,0.6799032089336539
scaffold_12584,34042,2500,0.07345613039942023
scaffold_10872,6893,2498,0.3624858025968218
scaffold_03978,27911,2497,0.08948168034143658
scaffold_08632,3476,2495,0.7178576849219238
scaffold_13095,21646,2495,0.11528136530246036
scaffold_12391,21467,2495,0.11625967881645816
scaffold_12694,5100,2491,0.48849035116620293
scaffold_10945,14784,2487,0.16823515272210443
scaffold_06714,6917,2486,0.3594374551181605
scaffold_12726,16226,2486,0.15324936530169928
scaffold_06862,45057,2482,0.055088835317938484
scaffold_00604,25003,2479,0.09918516894150635
scaffold_12001,20126,2478,0.12315056435727885
scaffold_12686,33001,2475,0.07502547118246261
scaffold_14458,16081,2475,0.15392784881721722
scaffold_09159,26302,2473,0.09405137169068334
scaffold_08697,82023,2471,0.030126660330009093
scaffold_06915,17722,2467,0.1392441028464241
scaffold_12287,6601,2466,0.37371182358384264
scaffold_12617,36721,2463,0.06707660076733969
scaffold_11242,19253,2462,0.12788701949021034
scaffold_02123,4802,2461,0.5126920300896198
scaffold_01063,19507,2460,0.12612317992102798
scaffold_11711,54301,2458,0.0452811323844441
scaffold_00625,33250,2458,0.07394331256002672
scaffold_11064,16458,2458,0.1493594392354965
scaffold_02838,34584,2458,0.07108519515415378
scaffold_06888,42903,2457,0.057277636038000956
scaffold_11144,24719,2456,0.09938610199108157
scaffold_09461,7766,2454,0.316098361942294
scaffold_07892,17535,2452,0.13987598190743974
scaffold_13841,30486,2452,0.08043548404728595
scaffold_11269,18278,2451,0.1341149657955912
scaffold_02377,3192,2449,0.7674167604515658
scaffold_10835,35399,2448,0.06917193142138343
scaffold_06562,24719,2446,0.09896381654871578
scaffold_11495,22361,2445,0.10936265758846993
scaffold_00400,21707,2445,0.11266755351293481
scaffold_10217,14412,2442,0.16948328190767223
scaffold_01952,22344,2442,0.1093235056646919
scaffold_04450,29615,2435,0.08223361373910086
scaffold_04167,3440,2432,0.7070400086978619
scaffold_13170,188872,2431,0.012872840534523934
scaffold_03333,33117,2431,0.07342943316695026
scaffold_02351,17534,2430,0.1385952502279407
scaffold_06849,102325,2429,0.02374597509440632
scaffold_00216,12219,2426,0.19859541385858215
scaffold_14043,23216,2424,0.10444769372073846
scaffold_09802,8990,2423,0.2695982873799372
scaffold_03244,17509,2420,0.13823909432164136
scaffold_07101,3774,2417,0.640437369100048
scaffold_07273,14559,2416,0.16595192400466183
scaffold_11708,10372,2416,0.23295082237769613
scaffold_02184,25525,2414,0.09459543698030132
scaffold_12831,15170,2412,0.15902124028721812
scaffold_08196,16283,2412,0.14817772732627818
scaffold_08866,22613,2411,0.10663476139390318
scaffold_03097,17155,2411,0.14056068941945785
scaffold_09756,17258,2410,0.13969723866835426
scaffold_14182,33212,2410,0.07258748196541763
scaffold_13079,16713,2408,0.14413745662778848
scaffold_12295,15893,2407,0.1514967089635025
scaffold_08637,22689,2405,0.1060359135676763
scaffold_07360,50627,2403,0.047471078115319594
scaffold_02727,16544,2402,0.145228408887693
scaffold_01399,20754,2400,0.1156824652919166
scaffold_06769,35621,2397,0.06729747081554316
scaffold_03137,15396,2396,0.1556350329859924
scaffold_13837,14503,2395,0.16517688488610816
scaffold_09505,45146,2395,0.05305278267650723
scaffold_10237,19807,2395,0.12096712658095708
scaffold_05267,18225,2394,0.1313673099231206
scaffold_14133,25113,2394,0.09533150417333484
scaffold_09450,11946,2392,0.20024565479858203
scaffold_11047,28183,2392,0.08488938025059456
scaffold_00797,4687,2390,0.5101302612415639
scaffold_05547,56559,2389,0.04225560797138004
scaffold_12153,20205,2388,0.1182117730478959
scaffold_02213,14169,2387,0.1685024843595254
scaffold_04704,9834,2385,0.24262282383788622
scaffold_00854,20472,2385,0.11650529186048125
scaffold_11410,30829,2383,0.07731379952039119
scaffold_04602,15138,2382,0.15739731642886254
scaffold_13328,22803,2382,0.10449136321416719
scaffold_11793,32561,2380,0.0731054778270676
scaffold_11886,12252,2380,0.19430661117802714
scaffold_10952,16837,2376,0.14117414219607446
scaffold_02415,16667,2374,0.14246999039106453
scaffold_10987,36254,2370,0.06539571491259762
scaffold_12281,57983,2369,0.040866740426883326
scaffold_03457,18152,2368,0.1304676519190768
scaffold_01852,41373,2366,0.05719185869675783
scaffold_04224,20216,2365,0.11703562057169384
scaffold_10193,17904,2364,0.13207228003503793
scaffold_09916,6960,2363,0.33960434719235033
scaffold_00775,10365,2361,0.227832125164566
scaffold_03186,24263,2359,0.097242073024351
scaffold_10979,18163,2358,0.1298282625425986
scaffold_00927,2513,2358,0.9385518617010165
scaffold_05939,21883,2354,0.10760300057211569
scaffold_04920,23186,2352,0.10147716457375554
scaffold_00352,28866,2351,0.0814553919713657
scaffold_14342,20367,2351,0.11545034110483195
scaffold_07090,13882,2347,0.1690876079895226
scaffold_03757,5564,2347,0.42190806860864427
scaffold_04855,20290,2344,0.11553775019079607
scaffold_04010,10509,2343,0.22295636309006298
scaffold_02466,14253,2342,0.16432465104812777
scaffold_09716,4540,2340,0.515451854852192
scaffold_04079,3084,2339,0.7587092137214686
scaffold_02117,3736,2338,0.6258669333065237
scaffold_06722,18100,2336,0.1290985675359343
scaffold_10250,4951,2333,0.4713382413395413
scaffold_13296,17868,2332,0.1305297691255902
scaffold_12811,27321,2329,0.0852779176671365
scaffold_13035,58920,2326,0.0394939219035892
scaffold_05448,41020,2324,0.05665589893565053
scaffold_08028,5281,2323,0.4399261027580698
scaffold_04831,13940,2323,0.16669418356276147
scaffold_08984,13249,2322,0.1752958627451314
scaffold_08907,11860,2320,0.19569002367607047
scaffold_10518,22629,2318,0.10245308844545711
scaffold_09977,36648,2317,0.06322391066998553
scaffold_01228,4120,2314,0.5617773966084554
scaffold_11490,20931,2312,0.11047385448033456
scaffold_14230,10249,2308,0.22527518073459848
scaffold_14290,22792,2308,0.1012961784456198
scaffold_13087,20951,2305,0.11004166183580742
scaffold_05083,5439,2304,0.42362027893629556
scaffold_04437,20093,2302,0.11459307576840937
scaffold_10384,5541,2301,0.4153594550948761
scaffold_06137,18177,2299,0.12649549848526057
scaffold_09102,16753,2299,0.13728687594583786
scaffold_00129,5539,2297,0.41481810339185726
scaffold_10570,34724,2296,0.06613697471934114
scaffold_13218,21277,2296,0.10793861769187599
scaffold_09478,33155,2295,0.06924030928549631
scaffold_08295,14170,2295,0.16202067558263403
scaffold_01442,20094,2294,0.11418778648816315
scaffold_06824,9591,2291,0.23890472434749266
scaffold_03603,57513,2291,0.039843948739436
scaffold_02669,9535,2291,0.24034159053034318
scaffold_05303,13759,2290,0.1664444583192705
scaffold_03558,5697,2290,0.40199348894259934
scaffold_00451,4559,2289,0.5022776468033205
scaffold_05657,16520,2288,0.13854130400512443
scaffold_14087,25522,2286,0.08959397446313672
scaffold_03596,19452,2285,0.1175158886484949
scaffold_03824,6118,2284,0.3734688539239719
scaffold_13304,13240,2282,0.17240200402483147
scaffold_03962,47502,2281,0.048030297385317354
scaffold_11420,13493,2281,0.16906222974229915
scaffold_02627,26477,2280,0.08611909433612423
scaffold_03077,12459,2279,0.1829855181215918
scaffold_01701,7486,2279,0.30449864338541843
scaffold_03896,16350,2277,0.13930408204808617
scaffold_00212,19200,2277,0.11863775148626965
scaffold_01903,20085,2276,0.11335199580872712
scaffold_12534,18137,2276,0.12554337186478456
scaffold_01985,15425,2274,0.14743002758174853
scaffold_04550,3725,2274,0.6106367447679536
scaffold_09328,17844,2272,0.12735336882887272
scaffold_07704,16211,2269,0.13998198017791774
scaffold_00796,17392,2266,0.1303236302286459
scaffold_08177,33527,2266,0.0676120060609303
scaffold_05612,40938,2266,0.055374733142402356
scaffold_10382,15365,2266,0.1475142176426115
scaffold_03826,20052,2264,0.1129231961252206
scaffold_12857,11639,2263,0.19449372679585028
scaffold_14403,13974,2263,0.16201010561591841
scaffold_12896,16201,2259,0.1394520678444778
scaffold_14450,19120,2257,0.11807267063267941
scaffold_07964,11877,2257,0.19003904743812547
scaffold_10219,20433,2256,0.11042269835205161
scaffold_05284,10092,2255,0.22352719624831466
scaffold_07327,20209,2254,0.11157585614472904
scaffold_06777,13997,2253,0.16098284440982738
scaffold_06125,30835,2253,0.07306744149131159
scaffold_01234,108624,2252,0.02073266870571458
scaffold_09652,11074,2252,0.20343100495511257
scaffold_12125,14450,2250,0.15571924197156786
scaffold_10516,15668,2249,0.1435866184223529
scaffold_01756,25550,2244,0.08785698832408326
scaffold_14495,13455,2241,0.16661843701571244
scaffold_01419,30766,2239,0.07280400500637463
scaffold_04598,23145,2239,0.09675883075595483
scaffold_11980,71996,2239,0.03110855990376764
scaffold_14351,20643,2238,0.10842845251465257
scaffold_13546,18938,2238,0.11822206062170373
scaffold_05018,56989,2234,0.03921728748357936
scaffold_10785,32742,2233,0.06820697673865064
scaffold_00574,3778,2232,0.5909073577634221
scaffold_14303,28870,2231,0.0772843090966038
scaffold_10503,12497,2230,0.17847585031743737
scaffold_03937,22013,2229,0.10129548021424509
scaffold_10348,26323,2228,0.08466638174458845
scaffold_08244,24497,2228,0.09097583902496265
scaffold_05533,23828,2226,0.09342207608527829
scaffold_02115,11956,2226,0.18623852882236944
scaffold_14419,15753,2226,0.14132924128907406
scaffold_04108,25032,2225,0.08891770453584953
scaffold_00162,12638,2224,0.1760038724824103
scaffold_08835,11474,2222,0.1936732224290418
scaffold_07999,35721,2222,0.06222361894424569
scaffold_09342,5394,2221,0.4118527240805024
scaffold_13036,13701,2219,0.16198977246721225
scaffold_11148,7413,2219,0.29934195345991244
scaffold_05743,5037,2217,0.44022822316872445
scaffold_12913,39722,2217,0.055815924308399156
scaffold_01881,15644,2216,0.14169305565727314
scaffold_01433,13802,2216,0.16058587075006422
scaffold_01959,17453,2215,0.12696219729166744
scaffold_13064,19539,2212,0.11321716686624815
scaffold_07498,62910,2210,0.03514417237399383
scaffold_10221,23847,2209,0.09267346633431753
scaffold_01642,26760,2208,0.08251138380550571
scaffold_10937,11206,2207,0.1969758202050227
scaffold_12821,27389,2207,0.0806043832336982
scaffold_07363,17527,2206,0.12591414037919355
scaffold_09165,15165,2205,0.14541821924296092
scaffold_00595,17069,2203,0.12911607753647
scaffold_04829,14887,2203,0.14800944708653266
scaffold_01043,17933,2202,0.12282207160825796
scaffold_04142,35103,2202,0.0627364167100771
scaffold_11549,28066,2201,0.07843649908102202
scaffold_04998,205971,2198,0.010675121468349223
scaffold_06051,25658,2197,0.0856410471052115
scaffold_09497,21838,2197,0.10062187038886311
scaffold_12397,41834,2195,0.0524786092640012
scaffold_10398,29681,2194,0.07392579484101412
scaffold_09217,20907,2193,0.1049188834180494
scaffold_08538,37690,2192,0.05817689601621048
scaffold_01658,23888,2191,0.09175296157857736
scaffold_08591,28164,2190,0.07777010614315238
scaffold_09369,15839,2189,0.13820523907075835
scaffold_01413,8494,2188,0.2576597261890533
scaffold_11429,4455,2186,0.49089411749458806
scaffold_03024,19627,2181,0.11117307228683607
scaffold_02370,21655,2178,0.1006047287711575
scaffold_13197,24712,2177,0.08810901773720492
scaffold_09659,23525,2175,0.09247222096037525
scaffold_06719,39875,2174,0.05453820788016997
scaffold_05861,21853,2172,0.09942344506225936
scaffold_10625,20700,2172,0.10497423908849449
scaffold_05368,3414,2170,0.6358162480605773
scaffold_11119,18243,2170,0.1189744401951151
scaffold_00739,36264,2168,0.05978959204892001
scaffold_07521,16034,2168,0.13526037849499195
scaffold_00246,3290,2167,0.6589435540636435
scaffold_14433,27895,2166,0.07768279783950782
scaffold_08989,30620,2166,0.07075409928502495
scaffold_05543,21349,2162,0.10130799344413713
scaffold_14501,20080,2161,0.10766855096849326
scaffold_10241,37155,2160,0.058137089457974814
scaffold_04030,12869,2160,0.16786764529946763
scaffold_12697,27117,2159,0.07964298178529604
scaffold_07939,29571,2159,0.07302653249338892
scaffold_07009,24733,2157,0.08723989419189862
scaffold_06891,16531,2157,0.13053572051524062
scaffold_08779,19706,2153,0.10929179383722001
scaffold_12415,30166,2152,0.07134492529825939
scaffold_12145,3219,2151,0.6683671188974034
scaffold_11034,16134,2147,0.13308994677742123
scaffold_09686,16160,2146,0.1328226226719223
scaffold_05145,14611,2146,0.14689773784278579
scaffold_00475,35382,2144,0.060609956883981866
scaffold_11516,30934,2144,0.06931386320616935
scaffold_10631,21119,2142,0.10145543529509558
scaffold_04548,4588,2142,0.4669567471189062
scaffold_10347,14262,2141,0.15014649235780464
scaffold_12900,12614,2141,0.16979425713219387
scaffold_08575,4131,2140,0.5180376665547282
scaffold_06997,12368,2140,0.17308250005513492
scaffold_14149,11700,2136,0.1825792813066308
scaffold_06428,29763,2135,0.07176604576093676
scaffold_04817,23969,2134,0.08907165605369761
scaffold_06221,20726,2134,0.10300216307515782
scaffold_05529,3964,2132,0.5380792226829445
scaffold_13920,55439,2128,0.03838846286737535
scaffold_00520,12109,2127,0.17569175939834725
scaffold_08500,17624,2126,0.12067429284642893
scaffold_08256,27250,2125,0.07800023543419825
scaffold_10084,32216,2125,0.06598009574390988
scaffold_13127,17392,2123,0.12211935580796557
scaffold_02584,21339,2117,0.09921030897024886
scaffold_06194,15507,2116,0.13650798605407202
scaffold_04934,18899,2115,0.11194678299063412
scaffold_00436,5372,2115,0.39386158952135203
scaffold_05231,43008,2115,0.04918032592297855
scaffold_11125,17553,2112,0.12035811407632752
scaffold_01808,9050,2111,0.2332624898334549
scaffold_04721,16458,2110,0.1282582193913102
scaffold_07531,22315,2109,0.09453491791586449
scaffold_07867,13797,2109,0.15286866154308754
scaffold_06992,15597,2108,0.1351933769846704
scaffold_10207,30313,2105,0.06944998832207532
scaffold_13588,8211,2104,0.25634385659448994
scaffold_02406,24552,2103,0.08568991752004997
scaffold_09075,57839,2102,0.03635641209055322
scaffold_13810,15477,2102,0.13585238679535885
scaffold_09638,29622,2101,0.07093803618538091
scaffold_08756,22541,2100,0.09318898434499566
scaffold_10032,15287,2100,0.13741204219884542
scaffold_01759,34021,2100,0.06173760709396914
scaffold_07750,26116,2099,0.0803907501755882
scaffold_08761,15767,2098,0.1330652724821726
scaffold_03753,22102,2097,0.09491938188725751
scaffold_03306,17565,2097,0.1194253673875113
scaffold_10502,24362,2096,0.08607283770324432
scaffold_11044,17855,2095,0.11735329873256779
scaffold_09365,18641,2095,0.11240162968057679
scaffold_13690,12897,2094,0.16237217412736515
scaffold_09909,17574,2094,0.11916931009994702
scaffold_09280,3400,2093,0.6158271962050337
scaffold_03410,57310,2093,0.036527911403629924
scaffold_14517,15354,2092,0.1363133804757067
scaffold_08423,2397,2092,0.8729131593623176
scaffold_12276,16856,2091,0.12409304897447149
scaffold_10627,23385,2091,0.08945471595400112
scaffold_12030,15354,2090,0.13617626054740384
scaffold_13323,25472,2089,0.0820235582401497
scaffold_06109,9331,2089,0.22394704693494655
scaffold_09543,12579,2089,0.16608537163369963
scaffold_01730,44615,2088,0.04680233826049924
scaffold_04646,34186,2087,0.06106793696792613
scaffold_00801,15153,2087,0.13777733281037094
scaffold_12497,14811,2087,0.14094400408329344
scaffold_13503,12338,2086,0.16912802440662603
scaffold_09343,26268,2082,0.07928159149906389
scaffold_11725,27465,2081,0.07577811840650661
scaffold_10600,7560,2081,0.27526562918449055
scaffold_04791,3573,2077,0.5813730988786818
scaffold_12813,6030,2076,0.3444195600880743
scaffold_07316,31165,2075,0.06659595733972627
scaffold_02673,6718,2074,0.3088392358651186
scaffold_08574,21112,2073,0.09820888185442933
scaffold_08077,4450,2072,0.46583442738398456
scaffold_06430,2808,2071,0.7377186417076891
scaffold_14103,16412,2069,0.1261185456079482
scaffold_01728,12961,2069,0.1596999075945428
scaffold_01348,15081,2066,0.1370061647022562
scaffold_06188,19941,2063,0.10349952999244826
scaffold_12861,35170,2060,0.058580168425585326
scaffold_01542,41221,2059,0.04995886759974679
scaffold_09113,17581,2057,0.11703132979164535
scaffold_01882,34156,2056,0.0602126872207212
scaffold_14272,15327,2053,0.1339467148066662
scaffold_00562,59307,2053,0.0346189641186936
scaffold_09905,15750,2052,0.1302958842144014
scaffold_08080,24369,2051,0.08416452076320802
scaffold_01408,29780,2049,0.06882692300731191
scaffold_13652,40298,2049,0.050854432622389215
scaffold_07397,26014,2048,0.0787456732311384
scaffold_13929,24011,2047,0.08526815765118535
scaffold_03983,215878,2047,0.00948617783782392
scaffold_12851,20475,2045,0.09990229822286895
scaffold_13257,45531,2045,0.04493430040815563
scaffold_10801,2486,2044,0.8224844382089467
scaffold_01670,9472,2044,0.21582834311992222
scaffold_07753,12991,2040,0.15705984872488205
scaffold_05476,35034,2038,0.05819856784622871
scaffold_06787,15863,2035,0.12830170435760424
scaffold_10931,3016,2034,0.6744784093291096
scaffold_04461,20462,2033,0.09935922039664434
scaffold_13325,9685,2032,0.20990499665430096
scaffold_03905,34123,2032,0.05956798313567146
scaffold_13724,78783,2032,0.025795661260383997
scaffold_12070,29126,2031,0.06976190717632562
scaffold_01739,15373,2031,0.13216637883161517
scaffold_00474,25343,2030,0.0801024917796458
scaffold_03589,21753,2030,0.09332537055156241
scaffold_02599,20746,2030,0.09788782444148814
scaffold_05923,10646,2029,0.19067972714539705
scaffold_00422,40393,2028,0.05021676234828544
scaffold_05049,18887,2026,0.10728126322872254
scaffold_08819,8791,2025,0.23039535255346444
scaffold_02232,12692,2024,0.15947402712270958
scaffold_03953,67570,2021,0.029915033493417648
scaffold_09513,15917,2020,0.1269478223489172
scaffold_12518,61595,2019,0.0327821922143428
scaffold_05059,4162,2018,0.4849136091354305
scaffold_02732,37124,2016,0.05431203316609208
scaffold_01628,22862,2015,0.08814576613042713
scaffold_10520,62367,2015,0.0323100966878646
scaffold_08529,16522,2011,0.12177330639715118
scaffold_12303,23253,2011,0.08648714769036478
scaffold_07934,25140,2011,0.08001833946736157
scaffold_03547,11209,2008,0.17916915284144286
scaffold_07236,23009,2008,0.08729577203774953
scaffold_09608,8276,2006,0.24240445530709648
scaffold_08098,19833,2006,0.10115717858934
scaffold_02914,12204,2005,0.16433804729360169
scaffold_02793,2994,2003,0.6691815090382156
scaffold_05740,5534,2003,0.36201840573832655
scaffold_00548,3852,2002,0.5198815264911605
scaffold_06978,16361,2001,0.12236093294785373
scaffold_06367,3657,2000,0.5471087981087148
scaffold_00724,11991,2000,0.1667920483491533
scaffold_00820,17652,1999,0.1132799429407988
scaffold_12615,5380,1998,0.37151821647880057
scaffold_06145,9986,1995,0.19981286309265436
scaffold_10096,33488,1995,0.05958466561444791
scaffold_00702,17306,1995,0.11531654747379756
scaffold_11817,14297,1994,0.13951560871361687
scaffold_01142,25613,1994,0.07787184005417681
scaffold_00553,19957,1992,0.09981986976435679
scaffold_01237,36800,1992,0.054147465327607364
scaffold_08624,20508,1992,0.09717316837480844
scaffold_00437,34695,1991,0.05740158555493218
scaffold_09000,12854,1991,0.1549155356303276
scaffold_04402,17789,1989,0.11181703519760396
scaffold_04480,17408,1987,0.11417942220091995
scaffold_01984,13834,1986,0.14356759561657434
scaffold_07177,20425,1986,0.09724041067739364
scaffold_12820,22387,1986,0.08873840343876209
scaffold_05323,18052,1985,0.1099702049410209
scaffold_04367,2616,1983,0.7583208541743565
scaffold_08606,19251,1983,0.1030345028723156
scaffold_11917,12440,1982,0.15935279734182214
scaffold_07356,13862,1980,0.14287163098303937
scaffold_12566,2917,1979,0.678753204993098
scaffold_08230,11875,1976,0.1664674075290127
scaffold_11960,17662,1975,0.11184712908956845
scaffold_08108,13128,1975,0.150479572844764
scaffold_09235,20179,1974,0.09783276724330564
scaffold_06825,12078,1974,0.16350159183769616
scaffold_08726,3125,1974,0.6318891125027024
scaffold_02976,5580,1972,0.35348371859234046
scaffold_03542,28035,1971,0.07033900924242088
scaffold_09651,18923,1971,0.10415899346151875
scaffold_12131,51618,1970,0.03818099043231875
scaffold_11134,19834,1970,0.09935810147739299
scaffold_00176,13261,1969,0.14851670416265764
scaffold_10772,32663,1968,0.060252437365966305
scaffold_00146,12559,1968,0.1567005440744164
scaffold_03159,24206,1967,0.08126709140568394
scaffold_10501,31244,1964,0.06289116483653003
scaffold_06798,32431,1964,0.06057147528177356
scaffold_02186,30950,1962,0.06341528920943203
scaffold_09517,45136,1961,0.04345961476890081
scaffold_13009,10716,1960,0.1829667056128328
scaffold_09619,16856,1960,0.11628457985883543
scaffold_00692,19756,1960,0.09925376145227316
scaffold_12049,16665,1959,0.11760196767914466
scaffold_12616,8838,1958,0.22161023708399186
scaffold_08272,17490,1957,0.11190011462720247
scaffold_11123,10816,1956,0.18089453697229468
scaffold_11918,13484,1956,0.14508484261516702
scaffold_02058,14034,1954,0.13924133971162128
scaffold_14505,9385,1953,0.20813291763594016
scaffold_04473,23248,1952,0.08397041028896877
scaffold_07610,4635,1950,0.4207754580554832
scaffold_02508,21886,1950,0.08911562634934829
scaffold_10786,14763,1949,0.1320623884736117
scaffold_10174,7538,1947,0.25832535942873663
scaffold_10270,9012,1947,0.21609277822531664
scaffold_10537,18343,1947,0.1061871811089828
scaffold_03511,21269,1946,0.09152863327954233
scaffold_08350,22947,1946,0.08482055793751721
scaffold_00786,17979,1946,0.10828036504159458
scaffold_13913,34496,1943,0.05633892917995952
scaffold_12880,13525,1942,0.14359438339519934
scaffold_03102,13721,1941,0.1414742738093407
scaffold_00252,14786,1939,0.13118401059265933
scaffold_11187,16384,1939,0.11836029256303607
scaffold_14369,28013,1938,0.06919223066581186
scaffold_08751,14147,1938,0.13701008141972082
scaffold_14221,12815,1937,0.15121843618646125
scaffold_03565,15523,1936,0.12474207410813716
scaffold_02355,21043,1936,0.09202719625671188
scaffold_02724,29086,1935,0.06654108139060498
scaffold_03708,24901,1934,0.0776850314973443
scaffold_10023,25165,1934,0.07685397913373122
scaffold_05564,12045,1934,0.16058696920353988
scaffold_04535,11979,1932,0.16132044373445448
scaffold_00375,65109,1932,0.029677821453912276
scaffold_13142,18165,1932,0.10640537383685311
scaffold_12239,16414,1931,0.11766906780231015
scaffold_01639,58398,1929,0.033049043654357194
scaffold_06512,14168,1929,0.13621350150132513
scaffold_05046,17771,1927,0.10848632436814654
scaffold_02813,39601,1927,0.04867126856461518
scaffold_03260,27546,1927,0.06997115016301089
scaffold_12166,10881,1927,0.17710773097020482
scaffold_03407,11142,1927,0.17296954776777512
scaffold_07751,5046,1926,0.3817656873133922
scaffold_07390,13357,1925,0.14419281777337492
scaffold_10741,15777,1925,0.1220721369578957
scaffold_07807,8214,1925,0.2344000165070082
scaffold_06190,22795,1923,0.08438530940407124
scaffold_12372,3886,1922,0.4946210999904579
scaffold_08064,16234,1919,0.11823659591045516
scaffold_10167,30431,1918,0.06304530915356873
scaffold_02331,3454,1918,0.5555684580240046
scaffold_00414,22770,1916,0.0841833170096825
scaffold_08257,18883,1915,0.10144337394195334
scaffold_05029,23056,1915,0.08309435319980103
scaffold_03430,18427,1913,0.10384932355903326
scaffold_05494,59826,1912,0.03197537513351421
scaffold_01041,37076,1912,0.051574554751414016
scaffold_08000,59476,1911,0.03214108854339517
scaffold_01467,36457,1910,0.05240368610127155
scaffold_12488,24938,1909,0.0765527144853006
scaffold_10020,42338,1908,0.045073842953561614
scaffold_13873,28311,1907,0.0673859872226734
scaffold_03092,12230,1906,0.1558824799206007
scaffold_13235,23676,1906,0.08052499628792625
scaffold_13335,16383,1905,0.1163098098069338
scaffold_05238,20808,1904,0.09154249415781816
scaffold_09498,11762,1904,0.16193901661844357
scaffold_09654,30397,1903,0.06260943708041863
scaffold_12814,11757,1903,0.16187184665951182
scaffold_05567,18129,1903,0.10498902505872723
scaffold_06942,15642,1900,0.12150387564290224
scaffold_11216,18664,1900,0.10184132554768999
scaffold_00818,14293,1900,0.1330018711352313
scaffold_06511,31618,1899,0.060074834022473746
scaffold_00956,18784,1895,0.10092947609811065
scaffold_00313,13233,1894,0.1431719891305597
scaffold_12781,19323,1894,0.09804633123231511
scaffold_08998,33062,1893,0.057281377745591146
scaffold_13605,14625,1893,0.1294675694238088
scaffold_00932,46976,1893,0.04029960174569336
scaffold_03204,22803,1892,0.08297602537481795
scaffold_14085,2425,1892,0.780525296338211
scaffold_12263,18666,1889,0.10121810948917956
scaffold_01557,14710,1886,0.12823278347207664
scaffold_09502,24034,1886,0.07850458010638378
scaffold_11546,23284,1886,0.08100909808536332
scaffold_04845,19923,1885,0.09464445793933411
scaffold_12229,15683,1884,0.12016054229146259
scaffold_04421,25429,1884,0.07411072411522068
scaffold_04087,13787,1884,0.13671324404807128
scaffold_03853,23278,1882,0.08086945492243236
scaffold_14205,25565,1882,0.07361658039861872
scaffold_04304,11431,1882,0.16472695514868252
scaffold_13836,34956,1881,0.0538248339266606
scaffold_01323,4516,1879,0.41615311093054974
scaffold_09691,8793,1878,0.21362444443142167
scaffold_05423,14931,1877,0.12577232883904618
scaffold_06485,11427,1876,0.16418192842338222
scaffold_07796,20585,1876,0.09118083505660364
scaffold_13799,29141,1875,0.0643586683777394
scaffold_14560,3326,1873,0.5632111624772876
scaffold_03208,13309,1873,0.14075474377964128
scaffold_09739,14878,1871,0.12581312221274388
scaffold_07790,19022,1868,0.09825204439202957
scaffold_06139,5180,1868,0.3607353734321018
scaffold_05158,163049,1868,0.011460838232567779
scaffold_02326,10965,1867,0.17035332935721934
scaffold_10068,8271,1866,0.2256884341319213
scaffold_07929,7161,1864,0.260417678136129
scaffold_09104,25688,1864,0.07257025902361085
scaffold_06558,18667,1863,0.0998486136511652
scaffold_03537,11100,1861,0.1676821500317086
scaffold_00813,27900,1861,0.06673551526721402
scaffold_08593,50163,1861,0.03711130106422398
scaffold_01156,16511,1861,0.11274867228916233
scaffold_05678,24691,1860,0.07534965894979954
scaffold_11476,27138,1857,0.06845939888768451
scaffold_11015,15214,1855,0.12197646423209747
scaffold_06640,4676,1855,0.3969033588059683
scaffold_03907,24113,1855,0.07696747461183068
scaffold_09705,9423,1854,0.19677348748674475
scaffold_13688,18184,1854,0.1019824787837068
scaffold_09838,19976,1854,0.092839712770217
scaffold_08097,19618,1852,0.09445045011341596
scaffold_13550,12296,1851,0.15058092703396525
scaffold_07253,17467,1850,0.10596832877457074
scaffold_06552,19697,1849,0.09388042355310522
scaffold_10668,14733,1848,0.1254908585988623
scaffold_10940,10849,1847,0.170248662705518
scaffold_12683,11216,1846,0.16462179062224955
scaffold_06354,11865,1844,0.1554723093776152
scaffold_07025,19242,1843,0.09582573431498215
scaffold_06083,21281,1840,0.0864646763577074
scaffold_04573,12974,1840,0.14183334383042331
scaffold_09767,15058,1840,0.1222377116068296
scaffold_07809,35140,1840,0.052383484742035386
scaffold_00891,13155,1839,0.13981565761876974
scaffold_14153,19943,1839,0.09222474275212511
scaffold_10024,5312,1838,0.3460540794416118
scaffold_13022,16573,1837,0.11087145378439894
scaffold_12209,23342,1834,0.07859734969563255
scaffold_10998,20234,1834,0.09068432500190719
scaffold_14031,18791,1834,0.09760644752142951
scaffold_14255,46114,1831,0.03971965935541413
scaffold_04621,2852,1831,0.6420990225350238
scaffold_05166,15809,1830,0.1157661250025889
scaffold_11540,25434,1830,0.0719703608594303
scaffold_13684,13882,1829,0.1317840349023298
scaffold_02429,18944,1827,0.09646452028994218
scaffold_00827,32712,1827,0.055876302102238706
scaffold_08797,2652,1827,0.6892072212628713
scaffold_14526,24390,1824,0.07481482116613546
scaffold_11206,4648,1824,0.39260647995536185
scaffold_10612,18895,1824,0.09656292027530525
scaffold_04762,10967,1821,0.16608045145335196
scaffold_06979,31962,1819,0.05694094206564764
scaffold_04168,3657,1818,0.4971748510915507
scaffold_02458,6550,1818,0.27767001714413786
scaffold_01797,3351,1817,0.5422324981394981
scaffold_05471,30289,1816,0.05996947429241816
scaffold_10171,41105,1814,0.04414796247085232
scaffold_01183,14794,1814,0.12263308422675084
scaffold_03660,69915,1814,0.02594839647350914
scaffold_09585,19524,1813,0.09287801253830197
scaffold_04070,17410,1813,0.10419256327424467
scaffold_02297,8120,1813,0.223331871478017
scaffold_12638,13702,1813,0.13237110145353265
scaffold_07585,10884,1810,0.16636938056483827
scaffold_01499,16796,1810,0.10780675334199229
scaffold_08535,22462,1810,0.08059112705848745
scaffold_05249,13138,1809,0.13771791466282082
scaffold_10555,16506,1808,0.10956301433601034
scaffold_01627,2873,1808,0.6295711860282187
scaffold_09002,17820,1807,0.10142328463885608
scaffold_01079,29760,1807,0.060744708067834274
scaffold_13186,91960,1804,0.0196215668259722
scaffold_14362,6381,1804,0.28273937474678346
scaffold_06804,36587,1802,0.049258173895165916
scaffold_04131,3671,1802,0.4909608618652475
scaffold_01387,23437,1802,0.07691298970768293
scaffold_06348,22635,1801,0.07957341018554277
scaffold_10666,4870,1800,0.3697277942446888
scaffold_09707,31872,1799,0.056447995068816065
scaffold_08365,14088,1799,0.1277618967314417
scaffold_13040,24495,1799,0.07346808888137994
scaffold_08760,28398,1797,0.0633102969276311
scaffold_04024,12586,1795,0.14266078293486134
scaffold_04588,14805,1795,0.12130785876235886
scaffold_01498,20953,1792,0.08553815339260368
scaffold_10031,13202,1792,0.1357869856104291
scaffold_08917,40765,1791,0.04393495208459329
scaffold_05636,11481,1790,0.15592196756238372
scaffold_07074,20250,1789,0.08837846906676916
scaffold_13382,21404,1789,0.08360531032341001
scaffold_11004,12164,1788,0.1469929384246784
scaffold_11774,8609,1787,0.20759305656340207
scaffold_14239,16201,1787,0.11030300399397153
scaffold_10943,11220,1786,0.15920401900040868
scaffold_03426,17619,1785,0.10134995143109896
scaffold_06056,29742,1785,0.06002204270410566
scaffold_07449,21690,1784,0.0822902570537479
scaffold_00690,8376,1783,0.21298245579869737
scaffold_10101,26550,1783,0.06715898248535662
scaffold_10587,13245,1780,0.13439987777804527
scaffold_06534,22168,1779,0.08025577092521484
scaffold_10056,8269,1779,0.215202143549483
scaffold_11494,23330,1777,0.07619332567305578
scaffold_12555,2917,1776,0.6088905053040357
scaffold_11408,30478,1776,0.058272384066365604
scaffold_00624,24699,1776,0.07194361476590491
scaffold_10271,3164,1773,0.5604641837613911
scaffold_12696,18591,1773,0.09537830664548082
scaffold_02046,18868,1772,0.09396047602212873
scaffold_08715,18569,1772,0.09544409146978033
scaffold_02951,20894,1770,0.08471633361381115
scaffold_02223,12004,1770,0.14751539073637912
scaffold_06037,13836,1769,0.1278739778892857
scaffold_06958,42929,1768,0.041200580791408245
scaffold_11085,24053,1765,0.07339285227735677
scaffold_11939,2277,1765,0.7754080275807258
scaffold_12031,8246,1765,0.21412499046187494
scaffold_12647,20681,1765,0.08536126603965428
scaffold_13483,27671,1763,0.06374696997221493
scaffold_14384,9393,1762,0.1876125727791392
scaffold_07683,3797,1761,0.4638018814301433
scaffold_09010,19491,1760,0.09030616708943047
scaffold_00394,44256,1759,0.03975738458806666
scaffold_07659,12231,1758,0.1437727003102212
scaffold_07557,23779,1757,0.07391437776136904
scaffold_11145,20378,1757,0.08624890023857451
scaffold_08871,17493,1756,0.1004298083026735
scaffold_04532,15279,1755,0.11492811353039821
scaffold_14318,9927,1755,0.17680561675955955
scaffold_01331,30850,1754,0.05686602187128314
scaffold_00547,9823,1753,0.1785075479551214
scaffold_05279,1937,1752,0.90474319625951
scaffold_09332,3389,1751,0.5169138536662465
scaffold_12237,77809,1750,0.02249355327684496
scaffold_01762,11975,1750,0.14621183620610065
scaffold_08442,26352,1747,0.06633121131238918
scaffold_08634,19454,1746,0.08978872586232697
scaffold_02027,42643,1745,0.04092175736781533
scaffold_05011,33456,1745,0.05218787864244913
scaffold_11766,11737,1745,0.1487083213425754
scaffold_08587,46021,1742,0.037854781242560406
scaffold_07921,23688,1742,0.07355721887448272
scaffold_13482,2322,1741,0.749852965606707
scaffold_10548,14534,1741,0.11982356891465062
scaffold_01744,19816,1740,0.08784282248699832
scaffold_03123,8861,1740,0.1964413576680285
scaffold_07852,3398,1740,0.51217394525616
scaffold_05816,11170,1739,0.15573310273409344
scaffold_01854,14809,1739,0.11747953023632092
scaffold_08618,11752,1737,0.14788010154583325
scaffold_01277,79475,1736,0.021849684975265446
scaffold_00492,29026,1736,0.05981928855215372
scaffold_06357,64537,1736,0.02689958304457207
scaffold_10067,3528,1734,0.4915749316776692
scaffold_13388,36799,1733,0.04710101667833726
scaffold_13336,22441,1733,0.07724046870662332
scaffold_07010,27789,1733,0.06237500563399831
scaffold_09518,20509,1732,0.08445525654911223
scaffold_04128,42551,1731,0.04069037025657795
scaffold_11503,9998,1730,0.17308575496334527
scaffold_08326,36153,1728,0.0478237743956745
scaffold_01121,18520,1728,0.09331604798889159
scaffold_12411,33119,1728,0.05220063309485269
scaffold_00374,15539,1726,0.11111214693169372
scaffold_12657,24677,1726,0.0699755937212698
scaffold_02346,18335,1724,0.09405203860407667
scaffold_03384,16855,1724,0.10230560356831837
scaffold_07325,8687,1722,0.19829558801429048
scaffold_09306,15136,1721,0.11376346723426688
scaffold_07883,22987,1720,0.07485873554919378
scaffold_02609,14422,1718,0.11919079918336649
scaffold_08078,19215,1717,0.0893908873359956
scaffold_03701,17645,1717,0.09735775099282394
scaffold_01087,16921,1716,0.10142919913478979
scaffold_10725,10580,1716,0.16220622079367672
scaffold_04770,12785,1715,0.1341793144004487
[truncated: 12,595 more rows]
